# Supplementary material for: ERDO - a framework to select an appropriate randomization procedure for clinical trials
Source: Springer Nature journal article supplement (doi:10.1186/s12874-017-0428-z), 2017-12-01
Supplement: MOESM1 [file 15277198]

This document includes detailed tables of the impact of selection bias effect  $\eta$  and linear time trend effect  $\theta$  separately and jointly on the type I error probability for different randomization procedures.

Table 1: Impact of selection bias effect  $\eta = 0.09$  and linear time trend effect  $\theta = 0.26$  with  $\sigma = 0.73$  on probability of type I error for different randomization procedures

| Randomization<br>Procedure<br>[ <i>RP</i> ] | Type I Error<br>Probability<br>[mean] | $P_{RP}(\omega \leq 0.05)$ |
|---------------------------------------------|---------------------------------------|----------------------------|
| CR                                          | 0.050                                 | 0.53                       |
| RAR                                         | 0.052                                 | 0.34                       |
| PBR(2)                                      | 0.105                                 | 0.00                       |
| PBR(10)                                     | 0.069                                 | 0.00                       |
| BSD(3)                                      | 0.054                                 | 0.11                       |
| BSD(4)                                      | 0.052                                 | 0.34                       |
| BSD(5)                                      | 0.051                                 | 0.46                       |
| MP(3)                                       | 0.062                                 | 0.00                       |
| MP(4)                                       | 0.058                                 | 0.01                       |
| MP(5)                                       | 0.055                                 | 0.06                       |
| EBC(0.67)                                   | 0.062                                 | 0.02                       |
| CHEN(2, 0.67)                               | 0.072                                 | 0.00                       |
| CHEN(3, 0.67)                               | 0.066                                 | 0.00                       |
| CHEN(4, 0.67)                               | 0.064                                 | 0.00                       |
| CHEN(5, 0.67)                               | 0.063                                 | 0.01                       |
| UD(0,1)                                     | 0.051                                 | 0.44                       |
| UD(1,2)                                     | 0.051                                 | 0.46                       |

Table 2: Impact of selection bias effect  $\eta = 0.09$  with  $\sigma = 0.73$  on probability of type I error for different randomization procedures

| Randomization<br>Procedure<br>[ <i>RP</i> ] | Type I Error<br>Probability<br>[mean] | $P_{RP}(\omega \leq 0.05)$ |
|---------------------------------------------|---------------------------------------|----------------------------|
| CR                                          | 0.050                                 | 0.47                       |
| RAR                                         | 0.052                                 | 0.12                       |
| PBR(2)                                      | 0.107                                 | 0.00                       |
| PBR(10)                                     | 0.071                                 | 0.00                       |
| BSD(3)                                      | 0.055                                 | 0.00                       |
| BSD(4)                                      | 0.053                                 | 0.10                       |
| BSD(5)                                      | 0.052                                 | 0.23                       |
| MP(3)                                       | 0.064                                 | 0.00                       |
| MP(4)                                       | 0.059                                 | 0.00                       |
| MP(5)                                       | 0.056                                 | 0.00                       |
| EBC(0.67)                                   | 0.064                                 | 0.00                       |
| CHEN(2, 0.67)                               | 0.074                                 | 0.00                       |
| CHEN(3, 0.67)                               | 0.068                                 | 0.00                       |
| CHEN(4, 0.67)                               | 0.065                                 | 0.00                       |
| CHEN(5, 0.67)                               | 0.064                                 | 0.00                       |
| UD(0,1)                                     | 0.052                                 | 0.23                       |
| UD(1,2)                                     | 0.052                                 | 0.26                       |

Table 3: Impact of linear time trend effect  $\theta = 0.26$  with  $\sigma = 0.73$  on probability of type I error for different randomization procedures

| Randomization<br>Procedure<br>[ <i>RP</i> ] | Type I Error<br>Probability<br>[mean] | $P_{RP}(\omega \leq 0.05)$ |
|---------------------------------------------|---------------------------------------|----------------------------|
| CR                                          | 0.050                                 | 0.67                       |
| RAR                                         | 0.050                                 | 0.66                       |
| PBR(2)                                      | 0.049                                 | 1.00                       |
| PBR(10)                                     | 0.049                                 | 1.00                       |
| BSD(3)                                      | 0.049                                 | 1.00                       |
| BSD(4)                                      | 0.049                                 | 0.99                       |
| BSD(5)                                      | 0.049                                 | 0.95                       |
| MP(3)                                       | 0.049                                 | 1.00                       |
| MP(4)                                       | 0.049                                 | 1.00                       |
| MP(5)                                       | 0.049                                 | 1.00                       |
| EBC(0.67)                                   | 0.049                                 | 0.99                       |
| CHEN(2, 0.67)                               | 0.049                                 | 1.00                       |
| CHEN(3, 0.67)                               | 0.049                                 | 1.00                       |
| CHEN(4, 0.67)                               | 0.049                                 | 1.00                       |
| CHEN(5, 0.67)                               | 0.049                                 | 1.00                       |
| UD(0,1)                                     | 0.050                                 | 0.81                       |
| UD(1,2)                                     | 0.050                                 | 0.81                       |

Table 4: Impact of selection bias effect  $\eta = 0.09$  and linear time trend effect  $\theta = 0.26$  with  $\sigma = 0.73$  on probability of type I error for Big Stick with varying MTI

| Randomization<br>Procedure<br>[ <i>RP</i> ] | Type I Error<br>Probability<br>[mean] | $P_{RP}(\omega \leq 0.05)$ |
|---------------------------------------------|---------------------------------------|----------------------------|
| BSD(10)                                     | 0.050                                 | 0.53                       |
| BSD(15)                                     | 0.051                                 | 0.51                       |
| BSD(20)                                     | 0.050                                 | 0.52                       |
| BSD(25)                                     | 0.050                                 | 0.53                       |
| BSD(30)                                     | 0.050                                 | 0.53                       |
| BSD(35)                                     | 0.050                                 | 0.53                       |
| BSD(40)                                     | 0.050                                 | 0.52                       |

Table 5: Impact of selection bias effect  $\eta = 0.09$  with  $\sigma = 0.73$  on probability of type I error for Big Stick with varying MTI

| Randomization<br>Procedure<br>[ <i>RP</i> ] | Type I Error<br>Probability<br>[mean] | $P_{RP}(\omega \leq 0.05)$ |
|---------------------------------------------|---------------------------------------|----------------------------|
| BSD(10)                                     | 0.051                                 | 0.41                       |
| BSD(15)                                     | 0.050                                 | 0.45                       |
| BSD(20)                                     | 0.050                                 | 0.46                       |
| BSD(25)                                     | 0.050                                 | 0.47                       |
| BSD(30)                                     | 0.050                                 | 0.47                       |
| BSD(35)                                     | 0.050                                 | 0.47                       |
| BSD(40)                                     | 0.050                                 | 0.47                       |

Table 6: Impact of linear time trend effect  $\theta = 0.26$  with  $\sigma = 0.73$  on probability of type I error for Big Stick with varying MTI

| Randomization<br>Procedure<br>[ <i>RP</i> ] | Type I Error<br>Probability<br>[mean] | $P_{RP}(\omega \leq 0.05)$ |
|---------------------------------------------|---------------------------------------|----------------------------|
| BSD(10)                                     | 0.050                                 | 0.69                       |
| BSD(15)                                     | 0.050                                 | 0.65                       |
| BSD(20)                                     | 0.050                                 | 0.66                       |
| BSD(25)                                     | 0.050                                 | 0.66                       |
| BSD(30)                                     | 0.050                                 | 0.67                       |
| BSD(35)                                     | 0.050                                 | 0.67                       |
| BSD(40)                                     | 0.050                                 | 0.67                       |

Table 7: Impact of selection bias effect  $\eta = 0.09$  and linear time trend effect  $\theta = 0.26$  with  $\sigma = 0.73$  on probability of type I error for various Wei's Urn Designs

| Randomization<br>Procedure<br>[ <i>RP</i> ] | Type I Error<br>Probability<br>[mean] | $P_{RP}(\omega \leq 0.05)$ |
|---------------------------------------------|---------------------------------------|----------------------------|
| UD(0,1)                                     | 0.051                                 | 0.44                       |
| UD(0,2)                                     | 0.051                                 | 0.44                       |
| UD(0,3)                                     | 0.051                                 | 0.44                       |
| UD(1,1)                                     | 0.051                                 | 0.47                       |
| UD(1,2)                                     | 0.051                                 | 0.46                       |
| UD(1,3)                                     | 0.051                                 | 0.45                       |
| UD(2,1)                                     | 0.051                                 | 0.48                       |
| UD(2,2)                                     | 0.051                                 | 0.47                       |
| UD(2,3)                                     | 0.051                                 | 0.46                       |

Table 8: Impact of selection bias effect  $\eta = 0.09$  and with  $\sigma = 0.73$  on probability of type I error for various Wei's Urn Designs

| Randomization<br>Procedure<br>[ <i>RP</i> ] | Type I Error<br>Probability<br>[mean] | $P_{RP}(\omega \leq 0.05)$ |
|---------------------------------------------|---------------------------------------|----------------------------|
| UD(0,1)                                     | 0.052                                 | 0.23                       |
| UD(0,2)                                     | 0.052                                 | 0.24                       |
| UD(0,3)                                     | 0.052                                 | 0.23                       |
| UD(1,1)                                     | 0.051                                 | 0.28                       |
| UD(1,2)                                     | 0.052                                 | 0.26                       |
| UD(1,3)                                     | 0.052                                 | 0.26                       |
| UD(2,1)                                     | 0.051                                 | 0.30                       |
| UD(2,2)                                     | 0.051                                 | 0.28                       |
| UD(2,3)                                     | 0.051                                 | 0.27                       |

Table 9: Impact of linear time trend effect  $\theta = 0.26$  with  $\sigma = 0.73$  on probability of type I error for various Wei's Urn Designs

| Randomization<br>Procedure<br>[ <i>RP</i> ] | Type I Error<br>Probability<br>[mean] | $P_{RP}(\omega \leq 0.05)$ |
|---------------------------------------------|---------------------------------------|----------------------------|
| UD(0,1)                                     | 0.050                                 | 0.81                       |
| UD(0,2)                                     | 0.050                                 | 0.81                       |
| UD(0,3)                                     | 0.050                                 | 0.81                       |
| UD(1,1)                                     | 0.050                                 | 0.80                       |
| UD(1,2)                                     | 0.050                                 | 0.81                       |
| UD(1,3)                                     | 0.050                                 | 0.80                       |
| UD(2,1)                                     | 0.050                                 | 0.79                       |
| UD(2,2)                                     | 0.050                                 | 0.80                       |
| UD(2,3)                                     | 0.050                                 | 0.80                       |
