# Supplementary material for: ERDO - a framework to select an appropriate randomization procedure for clinical trials
Source: Springer Nature journal article supplement (doi:10.1186/s12874-017-0428-z), 2017-12-01
Supplement: MOESM2 [file 15277198]

This document includes detailed tables of the sensitivity analysis. The amount of  $\eta$  and  $\theta$  is varied from the estimate by “50% changes”, resulting in the values 0.04, 0.09 and 0.14 for  $\eta$  and 0.13, 0.26 and 0.39 for  $\theta$ . Further the upper limit of the 95%-CI for  $\eta$  with  $(-0.09; 0.26)$  and for  $\theta$  with  $(-0.18; 0.71)$  are used as well as the point of no bias  $\eta = 0, \theta = 0$ . All resulting combinations of  $\eta$  and  $\theta$  are considered for the different randomization procedures.

Table 1: Sensitivity analysis for CR

| Randomization Procedure<br>[ $RP$ ] | Selection Bias Effect [ $\eta$ ] | Linear-Time Trend Bias Effect [ $\theta$ ] | Type I Error Probability<br>[mean] | $P_{RP}(\omega \leq 0.05)$ |
|-------------------------------------|----------------------------------|--------------------------------------------|------------------------------------|----------------------------|
| CR                                  | 0.00                             | 0.00                                       | 0.050                              | 0.00                       |
| CR                                  | 0.00                             | 0.13                                       | 0.050                              | 0.66                       |
| CR                                  | 0.00                             | 0.26                                       | 0.050                              | 0.67                       |
| CR                                  | 0.00                             | 0.39                                       | 0.050                              | 0.67                       |
| CR                                  | 0.00                             | 0.71                                       | 0.050                              | 0.69                       |
| CR                                  | 0.04                             | 0.00                                       | 0.050                              | 0.42                       |
| CR                                  | 0.04                             | 0.13                                       | 0.050                              | 0.52                       |
| CR                                  | 0.04                             | 0.26                                       | 0.050                              | 0.58                       |
| CR                                  | 0.04                             | 0.39                                       | 0.050                              | 0.64                       |
| CR                                  | 0.04                             | 0.71                                       | 0.050                              | 0.68                       |
| CR                                  | 0.09                             | 0.00                                       | 0.050                              | 0.47                       |
| CR                                  | 0.09                             | 0.13                                       | 0.050                              | 0.51                       |
| CR                                  | 0.09                             | 0.26                                       | 0.050                              | 0.53                       |
| CR                                  | 0.09                             | 0.39                                       | 0.050                              | 0.59                       |
| CR                                  | 0.09                             | 0.71                                       | 0.050                              | 0.65                       |
| CR                                  | 0.14                             | 0.00                                       | 0.051                              | 0.51                       |
| CR                                  | 0.14                             | 0.13                                       | 0.051                              | 0.52                       |
| CR                                  | 0.14                             | 0.26                                       | 0.051                              | 0.52                       |
| CR                                  | 0.14                             | 0.39                                       | 0.051                              | 0.56                       |
| CR                                  | 0.14                             | 0.71                                       | 0.051                              | 0.61                       |
| CR                                  | 0.26                             | 0.00                                       | 0.052                              | 0.46                       |
| CR                                  | 0.26                             | 0.13                                       | 0.052                              | 0.52                       |
| CR                                  | 0.26                             | 0.26                                       | 0.052                              | 0.55                       |
| CR                                  | 0.26                             | 0.39                                       | 0.052                              | 0.55                       |
| CR                                  | 0.26                             | 0.71                                       | 0.052                              | 0.58                       |

Table 2: Sensitivity analysis for RAR

| Randomization Procedure<br>[ $RP$ ] | Selection Bias Effect [ $\eta$ ] | Linear-Time Trend Bias Effect [ $\theta$ ] | Type I Error Probability<br>[mean] | $P_{RP}(\omega \leq 0.05)$ |
|-------------------------------------|----------------------------------|--------------------------------------------|------------------------------------|----------------------------|
| RAR                                 | 0.00                             | 0.00                                       | 0.050                              | 0.00                       |
| RAR                                 | 0.00                             | 0.13                                       | 0.050                              | 0.65                       |
| RAR                                 | 0.00                             | 0.26                                       | 0.050                              | 0.66                       |
| RAR                                 | 0.00                             | 0.39                                       | 0.050                              | 0.67                       |
| RAR                                 | 0.00                             | 0.71                                       | 0.050                              | 0.68                       |
| RAR                                 | 0.04                             | 0.00                                       | 0.050                              | 0.14                       |
| RAR                                 | 0.04                             | 0.13                                       | 0.050                              | 0.33                       |
| RAR                                 | 0.04                             | 0.26                                       | 0.051                              | 0.47                       |
| RAR                                 | 0.04                             | 0.39                                       | 0.050                              | 0.58                       |
| RAR                                 | 0.04                             | 0.71                                       | 0.050                              | 0.66                       |
| RAR                                 | 0.09                             | 0.00                                       | 0.052                              | 0.12                       |
| RAR                                 | 0.09                             | 0.13                                       | 0.052                              | 0.25                       |
| RAR                                 | 0.09                             | 0.26                                       | 0.052                              | 0.34                       |
| RAR                                 | 0.09                             | 0.39                                       | 0.052                              | 0.43                       |
| RAR                                 | 0.09                             | 0.71                                       | 0.052                              | 0.56                       |
| RAR                                 | 0.14                             | 0.00                                       | 0.055                              | 0.15                       |
| RAR                                 | 0.14                             | 0.13                                       | 0.055                              | 0.23                       |
| RAR                                 | 0.14                             | 0.26                                       | 0.055                              | 0.30                       |
| RAR                                 | 0.14                             | 0.39                                       | 0.055                              | 0.35                       |
| RAR                                 | 0.14                             | 0.71                                       | 0.054                              | 0.47                       |
| RAR                                 | 0.26                             | 0.00                                       | 0.065                              | 0.17                       |
| RAR                                 | 0.26                             | 0.13                                       | 0.065                              | 0.21                       |
| RAR                                 | 0.26                             | 0.26                                       | 0.065                              | 0.25                       |
| RAR                                 | 0.26                             | 0.39                                       | 0.065                              | 0.29                       |
| RAR                                 | 0.26                             | 0.71                                       | 0.064                              | 0.36                       |

Table 3: Sensitivity analysis for PBR(2)

| Randomization Procedure<br>[ $RP$ ] | Selection Bias Effect [ $\eta$ ] | Linear-Time Trend Bias Effect [ $\theta$ ] | Type I Error Probability<br>[mean] | $P_{RP}(\omega \leq 0.05)$ |
|-------------------------------------|----------------------------------|--------------------------------------------|------------------------------------|----------------------------|
| PBR(2)                              | 0.00                             | 0.00                                       | 0.050                              | 0.00                       |
| PBR(2)                              | 0.00                             | 0.13                                       | 0.050                              | 1.00                       |
| PBR(2)                              | 0.00                             | 0.26                                       | 0.049                              | 1.00                       |
| PBR(2)                              | 0.00                             | 0.39                                       | 0.047                              | 1.00                       |
| PBR(2)                              | 0.00                             | 0.71                                       | 0.042                              | 1.00                       |
| PBR(2)                              | 0.04                             | 0.00                                       | 0.061                              | 0.00                       |
| PBR(2)                              | 0.04                             | 0.13                                       | 0.061                              | 0.00                       |
| PBR(2)                              | 0.04                             | 0.26                                       | 0.060                              | 0.00                       |
| PBR(2)                              | 0.04                             | 0.39                                       | 0.058                              | 0.00                       |
| PBR(2)                              | 0.04                             | 0.71                                       | 0.052                              | 0.00                       |
| PBR(2)                              | 0.09                             | 0.00                                       | 0.107                              | 0.00                       |
| PBR(2)                              | 0.09                             | 0.13                                       | 0.106                              | 0.00                       |
| PBR(2)                              | 0.09                             | 0.26                                       | 0.105                              | 0.00                       |
| PBR(2)                              | 0.09                             | 0.39                                       | 0.102                              | 0.00                       |
| PBR(2)                              | 0.09                             | 0.71                                       | 0.093                              | 0.00                       |
| PBR(2)                              | 0.14                             | 0.00                                       | 0.190                              | 0.00                       |
| PBR(2)                              | 0.14                             | 0.13                                       | 0.189                              | 0.00                       |
| PBR(2)                              | 0.14                             | 0.26                                       | 0.187                              | 0.00                       |
| PBR(2)                              | 0.14                             | 0.39                                       | 0.183                              | 0.00                       |
| PBR(2)                              | 0.14                             | 0.71                                       | 0.169                              | 0.00                       |
| PBR(2)                              | 0.26                             | 0.00                                       | 0.510                              | 0.00                       |
| PBR(2)                              | 0.26                             | 0.13                                       | 0.509                              | 0.00                       |
| PBR(2)                              | 0.26                             | 0.26                                       | 0.506                              | 0.00                       |
| PBR(2)                              | 0.26                             | 0.39                                       | 0.501                              | 0.00                       |
| PBR(2)                              | 0.26                             | 0.71                                       | 0.480                              | 0.00                       |

Table 4: Sensitivity analysis for PBR(10)

| Randomization<br>Procedure<br>[ $RP$ ] | Selection<br>Bias<br>Effect [ $\eta$ ] | Linear-Time<br>Trend Bias<br>Effect [ $\theta$ ] | Type I Error<br>Probability<br>[mean] | $P_{RP}(\omega \leq 0.05)$ |
|----------------------------------------|----------------------------------------|--------------------------------------------------|---------------------------------------|----------------------------|
| PBR(10)                                | 0.00                                   | 0.00                                             | 0.050                                 | 0.00                       |
| PBR(10)                                | 0.00                                   | 0.13                                             | 0.050                                 | 1.00                       |
| PBR(10)                                | 0.00                                   | 0.26                                             | 0.049                                 | 1.00                       |
| PBR(10)                                | 0.00                                   | 0.39                                             | 0.047                                 | 1.00                       |
| PBR(10)                                | 0.00                                   | 0.71                                             | 0.042                                 | 1.00                       |
| PBR(10)                                | 0.04                                   | 0.00                                             | 0.054                                 | 0.00                       |
| PBR(10)                                | 0.04                                   | 0.13                                             | 0.054                                 | 0.00                       |
| PBR(10)                                | 0.04                                   | 0.26                                             | 0.053                                 | 0.00                       |
| PBR(10)                                | 0.04                                   | 0.39                                             | 0.051                                 | 0.10                       |
| PBR(10)                                | 0.04                                   | 0.71                                             | 0.045                                 | 1.00                       |
| PBR(10)                                | 0.09                                   | 0.00                                             | 0.071                                 | 0.00                       |
| PBR(10)                                | 0.09                                   | 0.13                                             | 0.070                                 | 0.00                       |
| PBR(10)                                | 0.09                                   | 0.26                                             | 0.069                                 | 0.00                       |
| PBR(10)                                | 0.09                                   | 0.39                                             | 0.067                                 | 0.00                       |
| PBR(10)                                | 0.09                                   | 0.71                                             | 0.060                                 | 0.01                       |
| PBR(10)                                | 0.14                                   | 0.00                                             | 0.099                                 | 0.00                       |
| PBR(10)                                | 0.14                                   | 0.13                                             | 0.098                                 | 0.00                       |
| PBR(10)                                | 0.14                                   | 0.26                                             | 0.097                                 | 0.00                       |
| PBR(10)                                | 0.14                                   | 0.39                                             | 0.095                                 | 0.00                       |
| PBR(10)                                | 0.14                                   | 0.71                                             | 0.086                                 | 0.00                       |
| PBR(10)                                | 0.26                                   | 0.00                                             | 0.216                                 | 0.00                       |
| PBR(10)                                | 0.26                                   | 0.13                                             | 0.215                                 | 0.00                       |
| PBR(10)                                | 0.26                                   | 0.26                                             | 0.213                                 | 0.00                       |
| PBR(10)                                | 0.26                                   | 0.39                                             | 0.209                                 | 0.00                       |
| PBR(10)                                | 0.26                                   | 0.71                                             | 0.195                                 | 0.00                       |

Table 5: Sensitivity analysis for BSD(3)

| Randomization<br>Procedure<br>[ $RP$ ] | Selection<br>Bias<br>Effect [ $\eta$ ] | Linear-Time<br>Trend Bias<br>Effect [ $\theta$ ] | Type I Error<br>Probability<br>[mean] | $P_{RP}(\omega \leq 0.05)$ |
|----------------------------------------|----------------------------------------|--------------------------------------------------|---------------------------------------|----------------------------|
| BSD(3)                                 | 0.00                                   | 0.00                                             | 0.050                                 | 0.00                       |
| BSD(3)                                 | 0.00                                   | 0.13                                             | 0.050                                 | 1.00                       |
| BSD(3)                                 | 0.00                                   | 0.26                                             | 0.049                                 | 1.00                       |
| BSD(3)                                 | 0.00                                   | 0.39                                             | 0.048                                 | 1.00                       |
| BSD(3)                                 | 0.00                                   | 0.71                                             | 0.042                                 | 1.00                       |
| BSD(3)                                 | 0.04                                   | 0.00                                             | 0.051                                 | 0.01                       |
| BSD(3)                                 | 0.04                                   | 0.13                                             | 0.051                                 | 0.10                       |
| BSD(3)                                 | 0.04                                   | 0.26                                             | 0.050                                 | 0.48                       |
| BSD(3)                                 | 0.04                                   | 0.39                                             | 0.049                                 | 0.85                       |
| BSD(3)                                 | 0.04                                   | 0.71                                             | 0.043                                 | 1.00                       |
| BSD(3)                                 | 0.09                                   | 0.00                                             | 0.055                                 | 0.00                       |
| BSD(3)                                 | 0.09                                   | 0.13                                             | 0.055                                 | 0.02                       |
| BSD(3)                                 | 0.09                                   | 0.26                                             | 0.054                                 | 0.11                       |
| BSD(3)                                 | 0.09                                   | 0.39                                             | 0.052                                 | 0.28                       |
| BSD(3)                                 | 0.09                                   | 0.71                                             | 0.047                                 | 0.73                       |
| BSD(3)                                 | 0.14                                   | 0.00                                             | 0.062                                 | 0.01                       |
| BSD(3)                                 | 0.14                                   | 0.13                                             | 0.062                                 | 0.02                       |
| BSD(3)                                 | 0.14                                   | 0.26                                             | 0.061                                 | 0.04                       |
| BSD(3)                                 | 0.14                                   | 0.39                                             | 0.059                                 | 0.10                       |
| BSD(3)                                 | 0.14                                   | 0.71                                             | 0.053                                 | 0.39                       |
| BSD(3)                                 | 0.26                                   | 0.00                                             | 0.089                                 | 0.01                       |
| BSD(3)                                 | 0.26                                   | 0.13                                             | 0.089                                 | 0.01                       |
| BSD(3)                                 | 0.26                                   | 0.26                                             | 0.087                                 | 0.02                       |
| BSD(3)                                 | 0.26                                   | 0.39                                             | 0.086                                 | 0.03                       |
| BSD(3)                                 | 0.26                                   | 0.71                                             | 0.079                                 | 0.11                       |

Table 6: Sensitivity analysis for BSD(4)

| Randomization<br>Procedure<br>[ $RP$ ] | Selection<br>Bias<br>Effect [ $\eta$ ] | Linear-Time<br>Trend Bias<br>Effect [ $\theta$ ] | Type I Error<br>Probability<br>[mean] | $P_{RP}(\omega \leq 0.05)$ |
|----------------------------------------|----------------------------------------|--------------------------------------------------|---------------------------------------|----------------------------|
| BSD(4)                                 | 0.00                                   | 0.00                                             | 0.050                                 | 0.00                       |
| BSD(4)                                 | 0.00                                   | 0.13                                             | 0.050                                 | 0.98                       |
| BSD(4)                                 | 0.00                                   | 0.26                                             | 0.049                                 | 0.99                       |
| BSD(4)                                 | 0.00                                   | 0.39                                             | 0.048                                 | 0.99                       |
| BSD(4)                                 | 0.00                                   | 0.71                                             | 0.043                                 | 0.99                       |
| BSD(4)                                 | 0.04                                   | 0.00                                             | 0.051                                 | 0.12                       |
| BSD(4)                                 | 0.04                                   | 0.13                                             | 0.050                                 | 0.32                       |
| BSD(4)                                 | 0.04                                   | 0.26                                             | 0.050                                 | 0.65                       |
| BSD(4)                                 | 0.04                                   | 0.39                                             | 0.048                                 | 0.86                       |
| BSD(4)                                 | 0.04                                   | 0.71                                             | 0.044                                 | 0.96                       |
| BSD(4)                                 | 0.09                                   | 0.00                                             | 0.053                                 | 0.10                       |
| BSD(4)                                 | 0.09                                   | 0.13                                             | 0.052                                 | 0.18                       |
| BSD(4)                                 | 0.09                                   | 0.26                                             | 0.052                                 | 0.34                       |
| BSD(4)                                 | 0.09                                   | 0.39                                             | 0.050                                 | 0.52                       |
| BSD(4)                                 | 0.09                                   | 0.71                                             | 0.045                                 | 0.80                       |
| BSD(4)                                 | 0.14                                   | 0.00                                             | 0.056                                 | 0.13                       |
| BSD(4)                                 | 0.14                                   | 0.13                                             | 0.056                                 | 0.16                       |
| BSD(4)                                 | 0.14                                   | 0.26                                             | 0.055                                 | 0.24                       |
| BSD(4)                                 | 0.14                                   | 0.39                                             | 0.053                                 | 0.34                       |
| BSD(4)                                 | 0.14                                   | 0.71                                             | 0.049                                 | 0.61                       |
| BSD(4)                                 | 0.26                                   | 0.00                                             | 0.068                                 | 0.15                       |
| BSD(4)                                 | 0.26                                   | 0.13                                             | 0.068                                 | 0.15                       |
| BSD(4)                                 | 0.26                                   | 0.26                                             | 0.067                                 | 0.18                       |
| BSD(4)                                 | 0.26                                   | 0.39                                             | 0.066                                 | 0.22                       |
| BSD(4)                                 | 0.26                                   | 0.71                                             | 0.061                                 | 0.35                       |

Table 7: Sensitivity analysis for BSD(5)

| Randomization<br>Procedure<br>[ <i>RP</i> ] | Selection<br>Bias<br>Effect [ $\eta$ ] | Linear-Time<br>Trend Bias<br>Effect [ $\theta$ ] | Type I Error<br>Probability<br>[mean] | $P_{RP}(\omega \leq 0.05)$ |
|---------------------------------------------|----------------------------------------|--------------------------------------------------|---------------------------------------|----------------------------|
| BSD(5)                                      | 0.00                                   | 0.00                                             | 0.050                                 | 0.00                       |
| BSD(5)                                      | 0.00                                   | 0.13                                             | 0.050                                 | 0.94                       |
| BSD(5)                                      | 0.00                                   | 0.26                                             | 0.049                                 | 0.95                       |
| BSD(5)                                      | 0.00                                   | 0.39                                             | 0.048                                 | 0.94                       |
| BSD(5)                                      | 0.00                                   | 0.71                                             | 0.044                                 | 0.96                       |
| BSD(5)                                      | 0.04                                   | 0.00                                             | 0.050                                 | 0.25                       |
| BSD(5)                                      | 0.04                                   | 0.13                                             | 0.050                                 | 0.45                       |
| BSD(5)                                      | 0.04                                   | 0.26                                             | 0.050                                 | 0.69                       |
| BSD(5)                                      | 0.04                                   | 0.39                                             | 0.048                                 | 0.84                       |
| BSD(5)                                      | 0.04                                   | 0.71                                             | 0.044                                 | 0.93                       |
| BSD(5)                                      | 0.09                                   | 0.00                                             | 0.052                                 | 0.23                       |
| BSD(5)                                      | 0.09                                   | 0.13                                             | 0.051                                 | 0.31                       |
| BSD(5)                                      | 0.09                                   | 0.26                                             | 0.051                                 | 0.46                       |
| BSD(5)                                      | 0.09                                   | 0.39                                             | 0.049                                 | 0.61                       |
| BSD(5)                                      | 0.09                                   | 0.71                                             | 0.045                                 | 0.81                       |
| BSD(5)                                      | 0.14                                   | 0.00                                             | 0.053                                 | 0.28                       |
| BSD(5)                                      | 0.14                                   | 0.13                                             | 0.053                                 | 0.31                       |
| BSD(5)                                      | 0.14                                   | 0.26                                             | 0.052                                 | 0.38                       |
| BSD(5)                                      | 0.14                                   | 0.39                                             | 0.051                                 | 0.47                       |
| BSD(5)                                      | 0.14                                   | 0.71                                             | 0.047                                 | 0.67                       |
| BSD(5)                                      | 0.26                                   | 0.00                                             | 0.060                                 | 0.29                       |
| BSD(5)                                      | 0.26                                   | 0.13                                             | 0.060                                 | 0.30                       |
| BSD(5)                                      | 0.26                                   | 0.26                                             | 0.059                                 | 0.33                       |
| BSD(5)                                      | 0.26                                   | 0.39                                             | 0.059                                 | 0.36                       |
| BSD(5)                                      | 0.26                                   | 0.71                                             | 0.054                                 | 0.48                       |

Table 8: Sensitivity analysis for BSD(10)

| Randomization<br>Procedure<br>[ $RP$ ] | Selection<br>Bias<br>Effect [ $\eta$ ] | Linear-Time<br>Trend Bias<br>Effect [ $\theta$ ] | Type I Error<br>Probability<br>[mean] | $P_{RP}(\omega \leq 0.05)$ |
|----------------------------------------|----------------------------------------|--------------------------------------------------|---------------------------------------|----------------------------|
| BSD(10)                                | 0.00                                   | 0.00                                             | 0.050                                 | 0.00                       |
| BSD(10)                                | 0.00                                   | 0.13                                             | 0.050                                 | 0.69                       |
| BSD(10)                                | 0.00                                   | 0.26                                             | 0.050                                 | 0.69                       |
| BSD(10)                                | 0.00                                   | 0.39                                             | 0.050                                 | 0.69                       |
| BSD(10)                                | 0.00                                   | 0.71                                             | 0.049                                 | 0.72                       |
| BSD(10)                                | 0.04                                   | 0.00                                             | 0.050                                 | 0.38                       |
| BSD(10)                                | 0.04                                   | 0.13                                             | 0.050                                 | 0.52                       |
| BSD(10)                                | 0.04                                   | 0.26                                             | 0.050                                 | 0.60                       |
| BSD(10)                                | 0.04                                   | 0.39                                             | 0.050                                 | 0.67                       |
| BSD(10)                                | 0.04                                   | 0.71                                             | 0.049                                 | 0.71                       |
| BSD(10)                                | 0.09                                   | 0.00                                             | 0.051                                 | 0.41                       |
| BSD(10)                                | 0.09                                   | 0.13                                             | 0.050                                 | 0.48                       |
| BSD(10)                                | 0.09                                   | 0.26                                             | 0.050                                 | 0.53                       |
| BSD(10)                                | 0.09                                   | 0.39                                             | 0.050                                 | 0.60                       |
| BSD(10)                                | 0.09                                   | 0.71                                             | 0.049                                 | 0.67                       |
| BSD(10)                                | 0.14                                   | 0.00                                             | 0.051                                 | 0.45                       |
| BSD(10)                                | 0.14                                   | 0.13                                             | 0.051                                 | 0.49                       |
| BSD(10)                                | 0.14                                   | 0.26                                             | 0.051                                 | 0.52                       |
| BSD(10)                                | 0.14                                   | 0.39                                             | 0.050                                 | 0.57                       |
| BSD(10)                                | 0.14                                   | 0.71                                             | 0.050                                 | 0.63                       |
| BSD(10)                                | 0.26                                   | 0.00                                             | 0.053                                 | 0.43                       |
| BSD(10)                                | 0.26                                   | 0.13                                             | 0.053                                 | 0.48                       |
| BSD(10)                                | 0.26                                   | 0.26                                             | 0.053                                 | 0.52                       |
| BSD(10)                                | 0.26                                   | 0.39                                             | 0.053                                 | 0.54                       |
| BSD(10)                                | 0.26                                   | 0.71                                             | 0.052                                 | 0.58                       |



Table 9: Sensitivity analysis for BSD(15)

| Randomization<br>Procedure<br>[ $RP$ ] | Selection<br>Bias<br>Effect [ $\eta$ ] | Linear-Time<br>Trend Bias<br>Effect [ $\theta$ ] | Type I Error<br>Probability<br>[mean] | $P_{RP}(\omega \leq 0.05)$ |
|----------------------------------------|----------------------------------------|--------------------------------------------------|---------------------------------------|----------------------------|
| BSD(15)                                | 0.00                                   | 0.00                                             | 0.050                                 | 0.00                       |
| BSD(15)                                | 0.00                                   | 0.13                                             | 0.050                                 | 0.64                       |
| BSD(15)                                | 0.00                                   | 0.26                                             | 0.050                                 | 0.65                       |
| BSD(15)                                | 0.00                                   | 0.39                                             | 0.050                                 | 0.65                       |
| BSD(15)                                | 0.00                                   | 0.71                                             | 0.050                                 | 0.67                       |
| BSD(15)                                | 0.04                                   | 0.00                                             | 0.050                                 | 0.40                       |
| BSD(15)                                | 0.04                                   | 0.13                                             | 0.050                                 | 0.50                       |
| BSD(15)                                | 0.04                                   | 0.26                                             | 0.050                                 | 0.55                       |
| BSD(15)                                | 0.04                                   | 0.39                                             | 0.050                                 | 0.63                       |
| BSD(15)                                | 0.04                                   | 0.71                                             | 0.050                                 | 0.66                       |
| BSD(15)                                | 0.09                                   | 0.00                                             | 0.050                                 | 0.45                       |
| BSD(15)                                | 0.09                                   | 0.13                                             | 0.050                                 | 0.49                       |
| BSD(15)                                | 0.09                                   | 0.26                                             | 0.051                                 | 0.51                       |
| BSD(15)                                | 0.09                                   | 0.39                                             | 0.050                                 | 0.57                       |
| BSD(15)                                | 0.09                                   | 0.71                                             | 0.051                                 | 0.63                       |
| BSD(15)                                | 0.14                                   | 0.00                                             | 0.051                                 | 0.49                       |
| BSD(15)                                | 0.14                                   | 0.13                                             | 0.051                                 | 0.50                       |
| BSD(15)                                | 0.14                                   | 0.26                                             | 0.051                                 | 0.50                       |
| BSD(15)                                | 0.14                                   | 0.39                                             | 0.051                                 | 0.54                       |
| BSD(15)                                | 0.14                                   | 0.71                                             | 0.051                                 | 0.60                       |
| BSD(15)                                | 0.26                                   | 0.00                                             | 0.052                                 | 0.44                       |
| BSD(15)                                | 0.26                                   | 0.13                                             | 0.052                                 | 0.50                       |
| BSD(15)                                | 0.26                                   | 0.26                                             | 0.052                                 | 0.53                       |
| BSD(15)                                | 0.26                                   | 0.39                                             | 0.052                                 | 0.53                       |
| BSD(15)                                | 0.26                                   | 0.71                                             | 0.053                                 | 0.56                       |

Table 10: Sensitivity analysis for BSD(20)

| Randomization<br>Procedure<br>[ $RP$ ] | Selection<br>Bias<br>Effect [ $\eta$ ] | Linear-Time<br>Trend Bias<br>Effect [ $\theta$ ] | Type I Error<br>Probability<br>[mean] | $P_{RP}(\omega \leq 0.05)$ |
|----------------------------------------|----------------------------------------|--------------------------------------------------|---------------------------------------|----------------------------|
| BSD(20)                                | 0.00                                   | 0.00                                             | 0.050                                 | 0.00                       |
| BSD(20)                                | 0.00                                   | 0.13                                             | 0.050                                 | 0.65                       |
| BSD(20)                                | 0.00                                   | 0.26                                             | 0.050                                 | 0.66                       |
| BSD(20)                                | 0.00                                   | 0.39                                             | 0.050                                 | 0.65                       |
| BSD(20)                                | 0.00                                   | 0.71                                             | 0.050                                 | 0.67                       |
| BSD(20)                                | 0.04                                   | 0.00                                             | 0.050                                 | 0.41                       |
| BSD(20)                                | 0.04                                   | 0.13                                             | 0.050                                 | 0.50                       |
| BSD(20)                                | 0.04                                   | 0.26                                             | 0.050                                 | 0.56                       |
| BSD(20)                                | 0.04                                   | 0.39                                             | 0.050                                 | 0.63                       |
| BSD(20)                                | 0.04                                   | 0.71                                             | 0.050                                 | 0.66                       |
| BSD(20)                                | 0.09                                   | 0.00                                             | 0.050                                 | 0.46                       |
| BSD(20)                                | 0.09                                   | 0.13                                             | 0.050                                 | 0.50                       |
| BSD(20)                                | 0.09                                   | 0.26                                             | 0.050                                 | 0.52                       |
| BSD(20)                                | 0.09                                   | 0.39                                             | 0.050                                 | 0.58                       |
| BSD(20)                                | 0.09                                   | 0.71                                             | 0.051                                 | 0.63                       |
| BSD(20)                                | 0.14                                   | 0.00                                             | 0.051                                 | 0.50                       |
| BSD(20)                                | 0.14                                   | 0.13                                             | 0.051                                 | 0.51                       |
| BSD(20)                                | 0.14                                   | 0.26                                             | 0.051                                 | 0.51                       |
| BSD(20)                                | 0.14                                   | 0.39                                             | 0.051                                 | 0.55                       |
| BSD(20)                                | 0.14                                   | 0.71                                             | 0.051                                 | 0.60                       |
| BSD(20)                                | 0.26                                   | 0.00                                             | 0.052                                 | 0.45                       |
| BSD(20)                                | 0.26                                   | 0.13                                             | 0.052                                 | 0.51                       |
| BSD(20)                                | 0.26                                   | 0.26                                             | 0.052                                 | 0.53                       |
| BSD(20)                                | 0.26                                   | 0.39                                             | 0.052                                 | 0.55                       |
| BSD(20)                                | 0.26                                   | 0.71                                             | 0.053                                 | 0.56                       |

Table 11: Sensitivity analysis for BSD(25)

| Randomization<br>Procedure<br>[ $RP$ ] | Selection<br>Bias<br>Effect [ $\eta$ ] | Linear-Time<br>Trend Bias<br>Effect [ $\theta$ ] | Type I Error<br>Probability<br>[mean] | $P_{RP}(\omega \leq 0.05)$ |
|----------------------------------------|----------------------------------------|--------------------------------------------------|---------------------------------------|----------------------------|
| BSD(25)                                | 0.00                                   | 0.00                                             | 0.050                                 | 0.00                       |
| BSD(25)                                | 0.00                                   | 0.13                                             | 0.050                                 | 0.65                       |
| BSD(25)                                | 0.00                                   | 0.26                                             | 0.050                                 | 0.66                       |
| BSD(25)                                | 0.00                                   | 0.39                                             | 0.050                                 | 0.66                       |
| BSD(25)                                | 0.00                                   | 0.71                                             | 0.050                                 | 0.68                       |
| BSD(25)                                | 0.04                                   | 0.00                                             | 0.050                                 | 0.41                       |
| BSD(25)                                | 0.04                                   | 0.13                                             | 0.050                                 | 0.51                       |
| BSD(25)                                | 0.04                                   | 0.26                                             | 0.050                                 | 0.57                       |
| BSD(25)                                | 0.04                                   | 0.39                                             | 0.050                                 | 0.64                       |
| BSD(25)                                | 0.04                                   | 0.71                                             | 0.050                                 | 0.67                       |
| BSD(25)                                | 0.09                                   | 0.00                                             | 0.050                                 | 0.47                       |
| BSD(25)                                | 0.09                                   | 0.13                                             | 0.050                                 | 0.50                       |
| BSD(25)                                | 0.09                                   | 0.26                                             | 0.050                                 | 0.53                       |
| BSD(25)                                | 0.09                                   | 0.39                                             | 0.050                                 | 0.58                       |
| BSD(25)                                | 0.09                                   | 0.71                                             | 0.051                                 | 0.64                       |
| BSD(25)                                | 0.14                                   | 0.00                                             | 0.051                                 | 0.51                       |
| BSD(25)                                | 0.14                                   | 0.13                                             | 0.051                                 | 0.51                       |
| BSD(25)                                | 0.14                                   | 0.26                                             | 0.051                                 | 0.52                       |
| BSD(25)                                | 0.14                                   | 0.39                                             | 0.051                                 | 0.56                       |
| BSD(25)                                | 0.14                                   | 0.71                                             | 0.051                                 | 0.61                       |
| BSD(25)                                | 0.26                                   | 0.00                                             | 0.052                                 | 0.45                       |
| BSD(25)                                | 0.26                                   | 0.13                                             | 0.052                                 | 0.52                       |
| BSD(25)                                | 0.26                                   | 0.26                                             | 0.052                                 | 0.54                       |
| BSD(25)                                | 0.26                                   | 0.39                                             | 0.052                                 | 0.55                       |
| BSD(25)                                | 0.26                                   | 0.71                                             | 0.053                                 | 0.57                       |

Table 12: Sensitivity analysis for BSD(30)

| Randomization<br>Procedure<br>[ $RP$ ] | Selection<br>Bias<br>Effect [ $\eta$ ] | Linear-Time<br>Trend Bias<br>Effect [ $\theta$ ] | Type I Error<br>Probability<br>[mean] | $P_{RP}(\omega \leq 0.05)$ |
|----------------------------------------|----------------------------------------|--------------------------------------------------|---------------------------------------|----------------------------|
| BSD(30)                                | 0.00                                   | 0.00                                             | 0.050                                 | 0.00                       |
| BSD(30)                                | 0.00                                   | 0.13                                             | 0.050                                 | 0.66                       |
| BSD(30)                                | 0.00                                   | 0.26                                             | 0.050                                 | 0.67                       |
| BSD(30)                                | 0.00                                   | 0.39                                             | 0.050                                 | 0.66                       |
| BSD(30)                                | 0.00                                   | 0.71                                             | 0.050                                 | 0.68                       |
| BSD(30)                                | 0.04                                   | 0.00                                             | 0.050                                 | 0.41                       |
| BSD(30)                                | 0.04                                   | 0.13                                             | 0.050                                 | 0.52                       |
| BSD(30)                                | 0.04                                   | 0.26                                             | 0.050                                 | 0.58                       |
| BSD(30)                                | 0.04                                   | 0.39                                             | 0.050                                 | 0.64                       |
| BSD(30)                                | 0.04                                   | 0.71                                             | 0.050                                 | 0.67                       |
| BSD(30)                                | 0.09                                   | 0.00                                             | 0.050                                 | 0.47                       |
| BSD(30)                                | 0.09                                   | 0.13                                             | 0.050                                 | 0.50                       |
| BSD(30)                                | 0.09                                   | 0.26                                             | 0.050                                 | 0.53                       |
| BSD(30)                                | 0.09                                   | 0.39                                             | 0.050                                 | 0.59                       |
| BSD(30)                                | 0.09                                   | 0.71                                             | 0.050                                 | 0.64                       |
| BSD(30)                                | 0.14                                   | 0.00                                             | 0.051                                 | 0.51                       |
| BSD(30)                                | 0.14                                   | 0.13                                             | 0.051                                 | 0.52                       |
| BSD(30)                                | 0.14                                   | 0.26                                             | 0.051                                 | 0.52                       |
| BSD(30)                                | 0.14                                   | 0.39                                             | 0.051                                 | 0.56                       |
| BSD(30)                                | 0.14                                   | 0.71                                             | 0.051                                 | 0.61                       |
| BSD(30)                                | 0.26                                   | 0.00                                             | 0.052                                 | 0.46                       |
| BSD(30)                                | 0.26                                   | 0.13                                             | 0.052                                 | 0.52                       |
| BSD(30)                                | 0.26                                   | 0.26                                             | 0.052                                 | 0.54                       |
| BSD(30)                                | 0.26                                   | 0.39                                             | 0.052                                 | 0.56                       |
| BSD(30)                                | 0.26                                   | 0.71                                             | 0.053                                 | 0.57                       |

Table 13: Sensitivity analysis for BSD(35)

| Randomization<br>Procedure<br>[ $RP$ ] | Selection<br>Bias<br>Effect [ $\eta$ ] | Linear-Time<br>Trend Bias<br>Effect [ $\theta$ ] | Type I Error<br>Probability<br>[mean] | $P_{RP}(\omega \leq 0.05)$ |
|----------------------------------------|----------------------------------------|--------------------------------------------------|---------------------------------------|----------------------------|
| BSD(35)                                | 0.00                                   | 0.00                                             | 0.050                                 | 0.00                       |
| BSD(35)                                | 0.00                                   | 0.13                                             | 0.050                                 | 0.66                       |
| BSD(35)                                | 0.00                                   | 0.26                                             | 0.050                                 | 0.67                       |
| BSD(35)                                | 0.00                                   | 0.39                                             | 0.050                                 | 0.66                       |
| BSD(35)                                | 0.00                                   | 0.71                                             | 0.050                                 | 0.68                       |
| BSD(35)                                | 0.04                                   | 0.00                                             | 0.050                                 | 0.41                       |
| BSD(35)                                | 0.04                                   | 0.13                                             | 0.050                                 | 0.52                       |
| BSD(35)                                | 0.04                                   | 0.26                                             | 0.050                                 | 0.58                       |
| BSD(35)                                | 0.04                                   | 0.39                                             | 0.050                                 | 0.65                       |
| BSD(35)                                | 0.04                                   | 0.71                                             | 0.050                                 | 0.68                       |
| BSD(35)                                | 0.09                                   | 0.00                                             | 0.050                                 | 0.47                       |
| BSD(35)                                | 0.09                                   | 0.13                                             | 0.050                                 | 0.51                       |
| BSD(35)                                | 0.09                                   | 0.26                                             | 0.050                                 | 0.53                       |
| BSD(35)                                | 0.09                                   | 0.39                                             | 0.050                                 | 0.59                       |
| BSD(35)                                | 0.09                                   | 0.71                                             | 0.050                                 | 0.64                       |
| BSD(35)                                | 0.14                                   | 0.00                                             | 0.051                                 | 0.50                       |
| BSD(35)                                | 0.14                                   | 0.13                                             | 0.051                                 | 0.52                       |
| BSD(35)                                | 0.14                                   | 0.26                                             | 0.051                                 | 0.52                       |
| BSD(35)                                | 0.14                                   | 0.39                                             | 0.051                                 | 0.56                       |
| BSD(35)                                | 0.14                                   | 0.71                                             | 0.051                                 | 0.61                       |
| BSD(35)                                | 0.26                                   | 0.00                                             | 0.052                                 | 0.46                       |
| BSD(35)                                | 0.26                                   | 0.13                                             | 0.052                                 | 0.52                       |
| BSD(35)                                | 0.26                                   | 0.26                                             | 0.052                                 | 0.54                       |
| BSD(35)                                | 0.26                                   | 0.39                                             | 0.052                                 | 0.56                       |
| BSD(35)                                | 0.26                                   | 0.71                                             | 0.053                                 | 0.57                       |

Table 14: Sensitivity analysis for BSD(40)

| Randomization<br>Procedure<br>[ $RP$ ] | Selection<br>Bias<br>Effect [ $\eta$ ] | Linear-Time<br>Trend Bias<br>Effect [ $\theta$ ] | Type I Error<br>Probability<br>[mean] | $P_{RP}(\omega \leq 0.05)$ |
|----------------------------------------|----------------------------------------|--------------------------------------------------|---------------------------------------|----------------------------|
| BSD(40)                                | 0.00                                   | 0.00                                             | 0.050                                 | 0.00                       |
| BSD(40)                                | 0.00                                   | 0.13                                             | 0.050                                 | 0.66                       |
| BSD(40)                                | 0.00                                   | 0.26                                             | 0.050                                 | 0.67                       |
| BSD(40)                                | 0.00                                   | 0.39                                             | 0.050                                 | 0.67                       |
| BSD(40)                                | 0.00                                   | 0.71                                             | 0.050                                 | 0.69                       |
| BSD(40)                                | 0.04                                   | 0.00                                             | 0.050                                 | 0.42                       |
| BSD(40)                                | 0.04                                   | 0.13                                             | 0.050                                 | 0.52                       |
| BSD(40)                                | 0.04                                   | 0.26                                             | 0.050                                 | 0.58                       |
| BSD(40)                                | 0.04                                   | 0.39                                             | 0.050                                 | 0.64                       |
| BSD(40)                                | 0.04                                   | 0.71                                             | 0.050                                 | 0.67                       |
| BSD(40)                                | 0.09                                   | 0.00                                             | 0.050                                 | 0.47                       |
| BSD(40)                                | 0.09                                   | 0.13                                             | 0.050                                 | 0.51                       |
| BSD(40)                                | 0.09                                   | 0.26                                             | 0.050                                 | 0.52                       |
| BSD(40)                                | 0.09                                   | 0.39                                             | 0.050                                 | 0.59                       |
| BSD(40)                                | 0.09                                   | 0.71                                             | 0.050                                 | 0.64                       |
| BSD(40)                                | 0.14                                   | 0.00                                             | 0.051                                 | 0.51                       |
| BSD(40)                                | 0.14                                   | 0.13                                             | 0.051                                 | 0.52                       |
| BSD(40)                                | 0.14                                   | 0.26                                             | 0.051                                 | 0.52                       |
| BSD(40)                                | 0.14                                   | 0.39                                             | 0.051                                 | 0.56                       |
| BSD(40)                                | 0.14                                   | 0.71                                             | 0.051                                 | 0.61                       |
| BSD(40)                                | 0.26                                   | 0.00                                             | 0.052                                 | 0.46                       |
| BSD(40)                                | 0.26                                   | 0.13                                             | 0.052                                 | 0.52                       |
| BSD(40)                                | 0.26                                   | 0.26                                             | 0.052                                 | 0.54                       |
| BSD(40)                                | 0.26                                   | 0.39                                             | 0.052                                 | 0.56                       |
| BSD(40)                                | 0.26                                   | 0.71                                             | 0.052                                 | 0.58                       |

Table 15: Sensitivity analysis for MP(3)

| Randomization<br>Procedure<br>[ $RP$ ] | Selection<br>Bias<br>Effect [ $\eta$ ] | Linear-Time<br>Trend Bias<br>Effect [ $\theta$ ] | Type I Error<br>Probability<br>[mean] | $P_{RP}(\omega \leq 0.05)$ |
|----------------------------------------|----------------------------------------|--------------------------------------------------|---------------------------------------|----------------------------|
| MP(3)                                  | 0.00                                   | 0.00                                             | 0.050                                 | 0.00                       |
| MP(3)                                  | 0.00                                   | 0.13                                             | 0.050                                 | 1.00                       |
| MP(3)                                  | 0.00                                   | 0.26                                             | 0.049                                 | 1.00                       |
| MP(3)                                  | 0.00                                   | 0.39                                             | 0.047                                 | 1.00                       |
| MP(3)                                  | 0.00                                   | 0.71                                             | 0.042                                 | 1.00                       |
| MP(3)                                  | 0.04                                   | 0.00                                             | 0.053                                 | 0.00                       |
| MP(3)                                  | 0.04                                   | 0.13                                             | 0.053                                 | 0.00                       |
| MP(3)                                  | 0.04                                   | 0.26                                             | 0.052                                 | 0.03                       |
| MP(3)                                  | 0.04                                   | 0.39                                             | 0.050                                 | 0.47                       |
| MP(3)                                  | 0.04                                   | 0.71                                             | 0.044                                 | 1.00                       |
| MP(3)                                  | 0.09                                   | 0.00                                             | 0.064                                 | 0.00                       |
| MP(3)                                  | 0.09                                   | 0.13                                             | 0.064                                 | 0.00                       |
| MP(3)                                  | 0.09                                   | 0.26                                             | 0.062                                 | 0.00                       |
| MP(3)                                  | 0.09                                   | 0.39                                             | 0.061                                 | 0.00                       |
| MP(3)                                  | 0.09                                   | 0.71                                             | 0.054                                 | 0.18                       |
| MP(3)                                  | 0.14                                   | 0.00                                             | 0.083                                 | 0.00                       |
| MP(3)                                  | 0.14                                   | 0.13                                             | 0.083                                 | 0.00                       |
| MP(3)                                  | 0.14                                   | 0.26                                             | 0.081                                 | 0.00                       |
| MP(3)                                  | 0.14                                   | 0.39                                             | 0.079                                 | 0.00                       |
| MP(3)                                  | 0.14                                   | 0.71                                             | 0.072                                 | 0.01                       |
| MP(3)                                  | 0.26                                   | 0.00                                             | 0.160                                 | 0.00                       |
| MP(3)                                  | 0.26                                   | 0.13                                             | 0.160                                 | 0.00                       |
| MP(3)                                  | 0.26                                   | 0.26                                             | 0.158                                 | 0.00                       |
| MP(3)                                  | 0.26                                   | 0.39                                             | 0.155                                 | 0.00                       |
| MP(3)                                  | 0.26                                   | 0.71                                             | 0.143                                 | 0.00                       |

Table 16: Sensitivity analysis for MP(4)

| Randomization<br>Procedure<br>[ $RP$ ] | Selection<br>Bias<br>Effect [ $\eta$ ] | Linear-Time<br>Trend Bias<br>Effect [ $\theta$ ] | Type I Error<br>Probability<br>[mean] | $P_{RP}(\omega \leq 0.05)$ |
|----------------------------------------|----------------------------------------|--------------------------------------------------|---------------------------------------|----------------------------|
| MP(4)                                  | 0.00                                   | 0.00                                             | 0.050                                 | 0.00                       |
| MP(4)                                  | 0.00                                   | 0.13                                             | 0.050                                 | 1.00                       |
| MP(4)                                  | 0.00                                   | 0.26                                             | 0.049                                 | 1.00                       |
| MP(4)                                  | 0.00                                   | 0.39                                             | 0.047                                 | 1.00                       |
| MP(4)                                  | 0.00                                   | 0.71                                             | 0.042                                 | 1.00                       |
| MP(4)                                  | 0.04                                   | 0.00                                             | 0.052                                 | 0.00                       |
| MP(4)                                  | 0.04                                   | 0.13                                             | 0.052                                 | 0.01                       |
| MP(4)                                  | 0.04                                   | 0.26                                             | 0.051                                 | 0.20                       |
| MP(4)                                  | 0.04                                   | 0.39                                             | 0.049                                 | 0.77                       |
| MP(4)                                  | 0.04                                   | 0.71                                             | 0.044                                 | 1.00                       |
| MP(4)                                  | 0.09                                   | 0.00                                             | 0.059                                 | 0.00                       |
| MP(4)                                  | 0.09                                   | 0.13                                             | 0.059                                 | 0.00                       |
| MP(4)                                  | 0.09                                   | 0.26                                             | 0.058                                 | 0.01                       |
| MP(4)                                  | 0.09                                   | 0.39                                             | 0.056                                 | 0.06                       |
| MP(4)                                  | 0.09                                   | 0.71                                             | 0.050                                 | 0.52                       |
| MP(4)                                  | 0.14                                   | 0.00                                             | 0.071                                 | 0.00                       |
| MP(4)                                  | 0.14                                   | 0.13                                             | 0.071                                 | 0.00                       |
| MP(4)                                  | 0.14                                   | 0.26                                             | 0.070                                 | 0.00                       |
| MP(4)                                  | 0.14                                   | 0.39                                             | 0.068                                 | 0.01                       |
| MP(4)                                  | 0.14                                   | 0.71                                             | 0.061                                 | 0.12                       |
| MP(4)                                  | 0.26                                   | 0.00                                             | 0.120                                 | 0.00                       |
| MP(4)                                  | 0.26                                   | 0.13                                             | 0.119                                 | 0.00                       |
| MP(4)                                  | 0.26                                   | 0.26                                             | 0.118                                 | 0.00                       |
| MP(4)                                  | 0.26                                   | 0.39                                             | 0.115                                 | 0.00                       |
| MP(4)                                  | 0.26                                   | 0.71                                             | 0.106                                 | 0.01                       |



Table 17: Sensitivity analysis for MP(5)

| Randomization<br>Procedure<br>[ <i>RP</i> ] | Selection<br>Bias<br>Effect [ $\eta$ ] | Linear-Time<br>Trend Bias<br>Effect [ $\theta$ ] | Type I Error<br>Probability<br>[mean] | $P_{RP}(\omega \leq 0.05)$ |
|---------------------------------------------|----------------------------------------|--------------------------------------------------|---------------------------------------|----------------------------|
| MP(5)                                       | 0.00                                   | 0.00                                             | 0.050                                 | 0.00                       |
| MP(5)                                       | 0.00                                   | 0.13                                             | 0.050                                 | 1.00                       |
| MP(5)                                       | 0.00                                   | 0.26                                             | 0.049                                 | 1.00                       |
| MP(5)                                       | 0.00                                   | 0.39                                             | 0.048                                 | 1.00                       |
| MP(5)                                       | 0.00                                   | 0.71                                             | 0.042                                 | 1.00                       |
| MP(5)                                       | 0.04                                   | 0.00                                             | 0.051                                 | 0.00                       |
| MP(5)                                       | 0.04                                   | 0.13                                             | 0.051                                 | 0.06                       |
| MP(5)                                       | 0.04                                   | 0.26                                             | 0.050                                 | 0.39                       |
| MP(5)                                       | 0.04                                   | 0.39                                             | 0.049                                 | 0.84                       |
| MP(5)                                       | 0.04                                   | 0.71                                             | 0.043                                 | 1.00                       |
| MP(5)                                       | 0.09                                   | 0.00                                             | 0.056                                 | 0.00                       |
| MP(5)                                       | 0.09                                   | 0.13                                             | 0.056                                 | 0.01                       |
| MP(5)                                       | 0.09                                   | 0.26                                             | 0.055                                 | 0.06                       |
| MP(5)                                       | 0.09                                   | 0.39                                             | 0.054                                 | 0.19                       |
| MP(5)                                       | 0.09                                   | 0.71                                             | 0.048                                 | 0.68                       |
| MP(5)                                       | 0.14                                   | 0.00                                             | 0.065                                 | 0.00                       |
| MP(5)                                       | 0.14                                   | 0.13                                             | 0.065                                 | 0.01                       |
| MP(5)                                       | 0.14                                   | 0.26                                             | 0.064                                 | 0.03                       |
| MP(5)                                       | 0.14                                   | 0.39                                             | 0.062                                 | 0.06                       |
| MP(5)                                       | 0.14                                   | 0.71                                             | 0.056                                 | 0.29                       |
| MP(5)                                       | 0.26                                   | 0.00                                             | 0.099                                 | 0.01                       |
| MP(5)                                       | 0.26                                   | 0.13                                             | 0.098                                 | 0.01                       |
| MP(5)                                       | 0.26                                   | 0.26                                             | 0.097                                 | 0.01                       |
| MP(5)                                       | 0.26                                   | 0.39                                             | 0.095                                 | 0.02                       |
| MP(5)                                       | 0.26                                   | 0.71                                             | 0.087                                 | 0.07                       |

Table 18: Sensitivity analysis for EBC(0.67)

| Randomization<br>Procedure<br>[ $RP$ ] | Selection<br>Bias<br>Effect [ $\eta$ ] | Linear-Time<br>Trend Bias<br>Effect [ $\theta$ ] | Type I Error<br>Probability<br>[mean] | $P_{RP}(\omega \leq 0.05)$ |
|----------------------------------------|----------------------------------------|--------------------------------------------------|---------------------------------------|----------------------------|
| EBC(0.67)                              | 0.00                                   | 0.00                                             | 0.050                                 | 0.00                       |
| EBC(0.67)                              | 0.00                                   | 0.13                                             | 0.050                                 | 0.99                       |
| EBC(0.67)                              | 0.00                                   | 0.26                                             | 0.049                                 | 0.99                       |
| EBC(0.67)                              | 0.00                                   | 0.39                                             | 0.048                                 | 0.99                       |
| EBC(0.67)                              | 0.00                                   | 0.71                                             | 0.043                                 | 0.99                       |
| EBC(0.67)                              | 0.04                                   | 0.00                                             | 0.053                                 | 0.00                       |
| EBC(0.67)                              | 0.04                                   | 0.13                                             | 0.052                                 | 0.02                       |
| EBC(0.67)                              | 0.04                                   | 0.26                                             | 0.052                                 | 0.15                       |
| EBC(0.67)                              | 0.04                                   | 0.39                                             | 0.050                                 | 0.46                       |
| EBC(0.67)                              | 0.04                                   | 0.71                                             | 0.045                                 | 0.92                       |
| EBC(0.67)                              | 0.09                                   | 0.00                                             | 0.064                                 | 0.00                       |
| EBC(0.67)                              | 0.09                                   | 0.13                                             | 0.063                                 | 0.00                       |
| EBC(0.67)                              | 0.09                                   | 0.26                                             | 0.062                                 | 0.02                       |
| EBC(0.67)                              | 0.09                                   | 0.39                                             | 0.061                                 | 0.06                       |
| EBC(0.67)                              | 0.09                                   | 0.71                                             | 0.055                                 | 0.31                       |
| EBC(0.67)                              | 0.14                                   | 0.00                                             | 0.082                                 | 0.00                       |
| EBC(0.67)                              | 0.14                                   | 0.13                                             | 0.082                                 | 0.00                       |
| EBC(0.67)                              | 0.14                                   | 0.26                                             | 0.081                                 | 0.01                       |
| EBC(0.67)                              | 0.14                                   | 0.39                                             | 0.079                                 | 0.02                       |
| EBC(0.67)                              | 0.14                                   | 0.71                                             | 0.072                                 | 0.10                       |
| EBC(0.67)                              | 0.26                                   | 0.00                                             | 0.158                                 | 0.00                       |
| EBC(0.67)                              | 0.26                                   | 0.13                                             | 0.157                                 | 0.00                       |
| EBC(0.67)                              | 0.26                                   | 0.26                                             | 0.155                                 | 0.00                       |
| EBC(0.67)                              | 0.26                                   | 0.39                                             | 0.153                                 | 0.01                       |
| EBC(0.67)                              | 0.26                                   | 0.71                                             | 0.142                                 | 0.02                       |

Table 19: Sensitivity analysis for CHEN(2, 0.67)

| Randomization<br>Procedure<br>[ $RP$ ] | Selection<br>Bias<br>Effect [ $\eta$ ] | Linear-Time<br>Trend Bias<br>Effect [ $\theta$ ] | Type I Error<br>Probability<br>[mean] | $P_{RP}(\omega \leq 0.05)$ |
|----------------------------------------|----------------------------------------|--------------------------------------------------|---------------------------------------|----------------------------|
| CHEN(2, 0.67)                          | 0.00                                   | 0.00                                             | 0.050                                 | 0.00                       |
| CHEN(2, 0.67)                          | 0.00                                   | 0.13                                             | 0.050                                 | 1.00                       |
| CHEN(2, 0.67)                          | 0.00                                   | 0.26                                             | 0.049                                 | 1.00                       |
| CHEN(2, 0.67)                          | 0.00                                   | 0.39                                             | 0.047                                 | 1.00                       |
| CHEN(2, 0.67)                          | 0.00                                   | 0.71                                             | 0.042                                 | 1.00                       |
| CHEN(2, 0.67)                          | 0.04                                   | 0.00                                             | 0.055                                 | 0.00                       |
| CHEN(2, 0.67)                          | 0.04                                   | 0.13                                             | 0.055                                 | 0.00                       |
| CHEN(2, 0.67)                          | 0.04                                   | 0.26                                             | 0.054                                 | 0.00                       |
| CHEN(2, 0.67)                          | 0.04                                   | 0.39                                             | 0.052                                 | 0.10                       |
| CHEN(2, 0.67)                          | 0.04                                   | 0.71                                             | 0.046                                 | 0.92                       |
| CHEN(2, 0.67)                          | 0.09                                   | 0.00                                             | 0.074                                 | 0.00                       |
| CHEN(2, 0.67)                          | 0.09                                   | 0.13                                             | 0.074                                 | 0.00                       |
| CHEN(2, 0.67)                          | 0.09                                   | 0.26                                             | 0.072                                 | 0.00                       |
| CHEN(2, 0.67)                          | 0.09                                   | 0.39                                             | 0.071                                 | 0.00                       |
| CHEN(2, 0.67)                          | 0.09                                   | 0.71                                             | 0.063                                 | 0.02                       |
| CHEN(2, 0.67)                          | 0.14                                   | 0.00                                             | 0.108                                 | 0.00                       |
| CHEN(2, 0.67)                          | 0.14                                   | 0.13                                             | 0.107                                 | 0.00                       |
| CHEN(2, 0.67)                          | 0.14                                   | 0.26                                             | 0.106                                 | 0.00                       |
| CHEN(2, 0.67)                          | 0.14                                   | 0.39                                             | 0.103                                 | 0.00                       |
| CHEN(2, 0.67)                          | 0.14                                   | 0.71                                             | 0.094                                 | 0.00                       |
| CHEN(2, 0.67)                          | 0.26                                   | 0.00                                             | 0.246                                 | 0.00                       |
| CHEN(2, 0.67)                          | 0.26                                   | 0.13                                             | 0.245                                 | 0.00                       |
| CHEN(2, 0.67)                          | 0.26                                   | 0.26                                             | 0.243                                 | 0.00                       |
| CHEN(2, 0.67)                          | 0.26                                   | 0.39                                             | 0.239                                 | 0.00                       |
| CHEN(2, 0.67)                          | 0.26                                   | 0.71                                             | 0.224                                 | 0.00                       |

Table 20: Sensitivity analysis for CHEN(3, 0.67)

| Randomization<br>Procedure<br>[ $RP$ ] | Selection<br>Bias<br>Effect [ $\eta$ ] | Linear-Time<br>Trend Bias<br>Effect [ $\theta$ ] | Type I Error<br>Probability<br>[mean] | $P_{RP}(\omega \leq 0.05)$ |
|----------------------------------------|----------------------------------------|--------------------------------------------------|---------------------------------------|----------------------------|
| CHEN(3, 0.67)                          | 0.00                                   | 0.00                                             | 0.050                                 | 0.00                       |
| CHEN(3, 0.67)                          | 0.00                                   | 0.13                                             | 0.050                                 | 1.00                       |
| CHEN(3, 0.67)                          | 0.00                                   | 0.26                                             | 0.049                                 | 1.00                       |
| CHEN(3, 0.67)                          | 0.00                                   | 0.39                                             | 0.047                                 | 1.00                       |
| CHEN(3, 0.67)                          | 0.00                                   | 0.71                                             | 0.042                                 | 1.00                       |
| CHEN(3, 0.67)                          | 0.04                                   | 0.00                                             | 0.053                                 | 0.00                       |
| CHEN(3, 0.67)                          | 0.04                                   | 0.13                                             | 0.053                                 | 0.00                       |
| CHEN(3, 0.67)                          | 0.04                                   | 0.26                                             | 0.052                                 | 0.02                       |
| CHEN(3, 0.67)                          | 0.04                                   | 0.39                                             | 0.051                                 | 0.31                       |
| CHEN(3, 0.67)                          | 0.04                                   | 0.71                                             | 0.045                                 | 0.96                       |
| CHEN(3, 0.67)                          | 0.09                                   | 0.00                                             | 0.068                                 | 0.00                       |
| CHEN(3, 0.67)                          | 0.09                                   | 0.13                                             | 0.067                                 | 0.00                       |
| CHEN(3, 0.67)                          | 0.09                                   | 0.26                                             | 0.066                                 | 0.00                       |
| CHEN(3, 0.67)                          | 0.09                                   | 0.39                                             | 0.064                                 | 0.00                       |
| CHEN(3, 0.67)                          | 0.09                                   | 0.71                                             | 0.058                                 | 0.14                       |
| CHEN(3, 0.67)                          | 0.14                                   | 0.00                                             | 0.092                                 | 0.00                       |
| CHEN(3, 0.67)                          | 0.14                                   | 0.13                                             | 0.091                                 | 0.00                       |
| CHEN(3, 0.67)                          | 0.14                                   | 0.26                                             | 0.090                                 | 0.00                       |
| CHEN(3, 0.67)                          | 0.14                                   | 0.39                                             | 0.088                                 | 0.00                       |
| CHEN(3, 0.67)                          | 0.14                                   | 0.71                                             | 0.080                                 | 0.01                       |
| CHEN(3, 0.67)                          | 0.26                                   | 0.00                                             | 0.191                                 | 0.00                       |
| CHEN(3, 0.67)                          | 0.26                                   | 0.13                                             | 0.190                                 | 0.00                       |
| CHEN(3, 0.67)                          | 0.26                                   | 0.26                                             | 0.188                                 | 0.00                       |
| CHEN(3, 0.67)                          | 0.26                                   | 0.39                                             | 0.185                                 | 0.00                       |
| CHEN(3, 0.67)                          | 0.26                                   | 0.71                                             | 0.172                                 | 0.00                       |

Table 21: Sensitivity analysis for CHEN(4, 0.67)

| Randomization<br>Procedure<br>[ $RP$ ] | Selection<br>Bias<br>Effect [ $\eta$ ] | Linear-Time<br>Trend Bias<br>Effect [ $\theta$ ] | Type I Error<br>Probability<br>[mean] | $P_{RP}(\omega \leq 0.05)$ |
|----------------------------------------|----------------------------------------|--------------------------------------------------|---------------------------------------|----------------------------|
| CHEN(4, 0.67)                          | 0.00                                   | 0.00                                             | 0.050                                 | 0.00                       |
| CHEN(4, 0.67)                          | 0.00                                   | 0.13                                             | 0.050                                 | 1.00                       |
| CHEN(4, 0.67)                          | 0.00                                   | 0.26                                             | 0.049                                 | 1.00                       |
| CHEN(4, 0.67)                          | 0.00                                   | 0.39                                             | 0.048                                 | 1.00                       |
| CHEN(4, 0.67)                          | 0.00                                   | 0.71                                             | 0.042                                 | 1.00                       |
| CHEN(4, 0.67)                          | 0.04                                   | 0.00                                             | 0.053                                 | 0.00                       |
| CHEN(4, 0.67)                          | 0.04                                   | 0.13                                             | 0.053                                 | 0.00                       |
| CHEN(4, 0.67)                          | 0.04                                   | 0.26                                             | 0.052                                 | 0.08                       |
| CHEN(4, 0.67)                          | 0.04                                   | 0.39                                             | 0.050                                 | 0.41                       |
| CHEN(4, 0.67)                          | 0.04                                   | 0.71                                             | 0.045                                 | 0.94                       |
| CHEN(4, 0.67)                          | 0.09                                   | 0.00                                             | 0.065                                 | 0.00                       |
| CHEN(4, 0.67)                          | 0.09                                   | 0.13                                             | 0.065                                 | 0.00                       |
| CHEN(4, 0.67)                          | 0.09                                   | 0.26                                             | 0.064                                 | 0.00                       |
| CHEN(4, 0.67)                          | 0.09                                   | 0.39                                             | 0.062                                 | 0.02                       |
| CHEN(4, 0.67)                          | 0.09                                   | 0.71                                             | 0.056                                 | 0.23                       |
| CHEN(4, 0.67)                          | 0.14                                   | 0.00                                             | 0.086                                 | 0.00                       |
| CHEN(4, 0.67)                          | 0.14                                   | 0.13                                             | 0.086                                 | 0.00                       |
| CHEN(4, 0.67)                          | 0.14                                   | 0.26                                             | 0.084                                 | 0.00                       |
| CHEN(4, 0.67)                          | 0.14                                   | 0.39                                             | 0.082                                 | 0.00                       |
| CHEN(4, 0.67)                          | 0.14                                   | 0.71                                             | 0.075                                 | 0.04                       |
| CHEN(4, 0.67)                          | 0.26                                   | 0.00                                             | 0.171                                 | 0.00                       |
| CHEN(4, 0.67)                          | 0.26                                   | 0.13                                             | 0.170                                 | 0.00                       |
| CHEN(4, 0.67)                          | 0.26                                   | 0.26                                             | 0.169                                 | 0.00                       |
| CHEN(4, 0.67)                          | 0.26                                   | 0.39                                             | 0.166                                 | 0.00                       |
| CHEN(4, 0.67)                          | 0.26                                   | 0.71                                             | 0.154                                 | 0.00                       |

Table 22: Sensitivity analysis for CHEN(5, 0.67)

| Randomization<br>Procedure<br>[ $RP$ ] | Selection<br>Bias<br>Effect [ $\eta$ ] | Linear-Time<br>Trend Bias<br>Effect [ $\theta$ ] | Type I Error<br>Probability<br>[mean] | $P_{RP}(\omega \leq 0.05)$ |
|----------------------------------------|----------------------------------------|--------------------------------------------------|---------------------------------------|----------------------------|
| CHEN(5, 0.67)                          | 0.00                                   | 0.00                                             | 0.050                                 | 0.00                       |
| CHEN(5, 0.67)                          | 0.00                                   | 0.13                                             | 0.050                                 | 1.00                       |
| CHEN(5, 0.67)                          | 0.00                                   | 0.26                                             | 0.049                                 | 1.00                       |
| CHEN(5, 0.67)                          | 0.00                                   | 0.39                                             | 0.048                                 | 1.00                       |
| CHEN(5, 0.67)                          | 0.00                                   | 0.71                                             | 0.042                                 | 1.00                       |
| CHEN(5, 0.67)                          | 0.04                                   | 0.00                                             | 0.053                                 | 0.00                       |
| CHEN(5, 0.67)                          | 0.04                                   | 0.13                                             | 0.053                                 | 0.01                       |
| CHEN(5, 0.67)                          | 0.04                                   | 0.26                                             | 0.052                                 | 0.11                       |
| CHEN(5, 0.67)                          | 0.04                                   | 0.39                                             | 0.050                                 | 0.45                       |
| CHEN(5, 0.67)                          | 0.04                                   | 0.71                                             | 0.045                                 | 0.93                       |
| CHEN(5, 0.67)                          | 0.09                                   | 0.00                                             | 0.064                                 | 0.00                       |
| CHEN(5, 0.67)                          | 0.09                                   | 0.13                                             | 0.064                                 | 0.00                       |
| CHEN(5, 0.67)                          | 0.09                                   | 0.26                                             | 0.063                                 | 0.01                       |
| CHEN(5, 0.67)                          | 0.09                                   | 0.39                                             | 0.061                                 | 0.03                       |
| CHEN(5, 0.67)                          | 0.09                                   | 0.71                                             | 0.055                                 | 0.28                       |
| CHEN(5, 0.67)                          | 0.14                                   | 0.00                                             | 0.084                                 | 0.00                       |
| CHEN(5, 0.67)                          | 0.14                                   | 0.13                                             | 0.083                                 | 0.00                       |
| CHEN(5, 0.67)                          | 0.14                                   | 0.26                                             | 0.082                                 | 0.00                       |
| CHEN(5, 0.67)                          | 0.14                                   | 0.39                                             | 0.080                                 | 0.01                       |
| CHEN(5, 0.67)                          | 0.14                                   | 0.71                                             | 0.073                                 | 0.06                       |
| CHEN(5, 0.67)                          | 0.26                                   | 0.00                                             | 0.164                                 | 0.00                       |
| CHEN(5, 0.67)                          | 0.26                                   | 0.13                                             | 0.163                                 | 0.00                       |
| CHEN(5, 0.67)                          | 0.26                                   | 0.26                                             | 0.161                                 | 0.00                       |
| CHEN(5, 0.67)                          | 0.26                                   | 0.39                                             | 0.159                                 | 0.00                       |
| CHEN(5, 0.67)                          | 0.26                                   | 0.71                                             | 0.147                                 | 0.01                       |

Table 23: Sensitivity analysis for Wei's urn design UD(0,1)

| Randomization<br>Procedure<br>[ $RP$ ] | Selection<br>Bias<br>Effect [ $\eta$ ] | Linear-Time<br>Trend Bias<br>Effect [ $\theta$ ] | Type I Error<br>Probability<br>[mean] | $P_{RP}(\omega \leq 0.05)$ |
|----------------------------------------|----------------------------------------|--------------------------------------------------|---------------------------------------|----------------------------|
| UD(0,1)                                | 0.00                                   | 0.00                                             | 0.050                                 | 0.00                       |
| UD(0,1)                                | 0.00                                   | 0.13                                             | 0.050                                 | 0.80                       |
| UD(0,1)                                | 0.00                                   | 0.26                                             | 0.050                                 | 0.81                       |
| UD(0,1)                                | 0.00                                   | 0.39                                             | 0.049                                 | 0.80                       |
| UD(0,1)                                | 0.00                                   | 0.71                                             | 0.046                                 | 0.83                       |
| UD(0,1)                                | 0.04                                   | 0.00                                             | 0.050                                 | 0.24                       |
| UD(0,1)                                | 0.04                                   | 0.13                                             | 0.050                                 | 0.43                       |
| UD(0,1)                                | 0.04                                   | 0.26                                             | 0.050                                 | 0.61                       |
| UD(0,1)                                | 0.04                                   | 0.39                                             | 0.049                                 | 0.73                       |
| UD(0,1)                                | 0.04                                   | 0.71                                             | 0.047                                 | 0.80                       |
| UD(0,1)                                | 0.09                                   | 0.00                                             | 0.052                                 | 0.23                       |
| UD(0,1)                                | 0.09                                   | 0.13                                             | 0.052                                 | 0.31                       |
| UD(0,1)                                | 0.09                                   | 0.26                                             | 0.051                                 | 0.44                       |
| UD(0,1)                                | 0.09                                   | 0.39                                             | 0.050                                 | 0.55                       |
| UD(0,1)                                | 0.09                                   | 0.71                                             | 0.048                                 | 0.71                       |
| UD(0,1)                                | 0.14                                   | 0.00                                             | 0.054                                 | 0.27                       |
| UD(0,1)                                | 0.14                                   | 0.13                                             | 0.053                                 | 0.31                       |
| UD(0,1)                                | 0.14                                   | 0.26                                             | 0.053                                 | 0.37                       |
| UD(0,1)                                | 0.14                                   | 0.39                                             | 0.052                                 | 0.45                       |
| UD(0,1)                                | 0.14                                   | 0.71                                             | 0.050                                 | 0.60                       |
| UD(0,1)                                | 0.26                                   | 0.00                                             | 0.062                                 | 0.28                       |
| UD(0,1)                                | 0.26                                   | 0.13                                             | 0.061                                 | 0.30                       |
| UD(0,1)                                | 0.26                                   | 0.26                                             | 0.061                                 | 0.33                       |
| UD(0,1)                                | 0.26                                   | 0.39                                             | 0.060                                 | 0.36                       |
| UD(0,1)                                | 0.26                                   | 0.71                                             | 0.058                                 | 0.46                       |

Table 24: Sensitivity analysis for Wei's urn design UD(0,2)

| Randomization<br>Procedure<br>[ $RP$ ] | Selection<br>Bias<br>Effect [ $\eta$ ] | Linear-Time<br>Trend Bias<br>Effect [ $\theta$ ] | Type I Error<br>Probability<br>[mean] | $P_{RP}(\omega \leq 0.05)$ |
|----------------------------------------|----------------------------------------|--------------------------------------------------|---------------------------------------|----------------------------|
| UD(0,2)                                | 0.00                                   | 0.00                                             | 0.050                                 | 0.00                       |
| UD(0,2)                                | 0.00                                   | 0.13                                             | 0.050                                 | 0.80                       |
| UD(0,2)                                | 0.00                                   | 0.26                                             | 0.050                                 | 0.81                       |
| UD(0,2)                                | 0.00                                   | 0.39                                             | 0.049                                 | 0.81                       |
| UD(0,2)                                | 0.00                                   | 0.71                                             | 0.046                                 | 0.83                       |
| UD(0,2)                                | 0.04                                   | 0.00                                             | 0.050                                 | 0.24                       |
| UD(0,2)                                | 0.04                                   | 0.13                                             | 0.050                                 | 0.43                       |
| UD(0,2)                                | 0.04                                   | 0.26                                             | 0.050                                 | 0.61                       |
| UD(0,2)                                | 0.04                                   | 0.39                                             | 0.049                                 | 0.73                       |
| UD(0,2)                                | 0.04                                   | 0.71                                             | 0.047                                 | 0.80                       |
| UD(0,2)                                | 0.09                                   | 0.00                                             | 0.052                                 | 0.24                       |
| UD(0,2)                                | 0.09                                   | 0.13                                             | 0.052                                 | 0.31                       |
| UD(0,2)                                | 0.09                                   | 0.26                                             | 0.051                                 | 0.44                       |
| UD(0,2)                                | 0.09                                   | 0.39                                             | 0.050                                 | 0.55                       |
| UD(0,2)                                | 0.09                                   | 0.71                                             | 0.048                                 | 0.70                       |
| UD(0,2)                                | 0.14                                   | 0.00                                             | 0.054                                 | 0.27                       |
| UD(0,2)                                | 0.14                                   | 0.13                                             | 0.053                                 | 0.30                       |
| UD(0,2)                                | 0.14                                   | 0.26                                             | 0.053                                 | 0.37                       |
| UD(0,2)                                | 0.14                                   | 0.39                                             | 0.052                                 | 0.45                       |
| UD(0,2)                                | 0.14                                   | 0.71                                             | 0.050                                 | 0.61                       |
| UD(0,2)                                | 0.26                                   | 0.00                                             | 0.062                                 | 0.28                       |
| UD(0,2)                                | 0.26                                   | 0.13                                             | 0.062                                 | 0.29                       |
| UD(0,2)                                | 0.26                                   | 0.26                                             | 0.061                                 | 0.33                       |
| UD(0,2)                                | 0.26                                   | 0.39                                             | 0.060                                 | 0.36                       |
| UD(0,2)                                | 0.26                                   | 0.71                                             | 0.058                                 | 0.46                       |



Table 25: Sensitivity analysis for Wei's urn design UD(0,3)

| Randomization<br>Procedure<br>[ $RP$ ] | Selection<br>Bias<br>Effect [ $\eta$ ] | Linear-Time<br>Trend Bias<br>Effect [ $\theta$ ] | Type I Error<br>Probability<br>[mean] | $P_{RP}(\omega \leq 0.05)$ |
|----------------------------------------|----------------------------------------|--------------------------------------------------|---------------------------------------|----------------------------|
| UD(0,3)                                | 0.00                                   | 0.00                                             | 0.050                                 | 0.00                       |
| UD(0,3)                                | 0.00                                   | 0.13                                             | 0.050                                 | 0.80                       |
| UD(0,3)                                | 0.00                                   | 0.26                                             | 0.050                                 | 0.81                       |
| UD(0,3)                                | 0.00                                   | 0.39                                             | 0.049                                 | 0.81                       |
| UD(0,3)                                | 0.00                                   | 0.71                                             | 0.046                                 | 0.82                       |
| UD(0,3)                                | 0.04                                   | 0.00                                             | 0.050                                 | 0.24                       |
| UD(0,3)                                | 0.04                                   | 0.13                                             | 0.050                                 | 0.43                       |
| UD(0,3)                                | 0.04                                   | 0.26                                             | 0.050                                 | 0.61                       |
| UD(0,3)                                | 0.04                                   | 0.39                                             | 0.049                                 | 0.72                       |
| UD(0,3)                                | 0.04                                   | 0.71                                             | 0.047                                 | 0.80                       |
| UD(0,3)                                | 0.09                                   | 0.00                                             | 0.052                                 | 0.23                       |
| UD(0,3)                                | 0.09                                   | 0.13                                             | 0.052                                 | 0.31                       |
| UD(0,3)                                | 0.09                                   | 0.26                                             | 0.051                                 | 0.44                       |
| UD(0,3)                                | 0.09                                   | 0.39                                             | 0.050                                 | 0.55                       |
| UD(0,3)                                | 0.09                                   | 0.71                                             | 0.048                                 | 0.70                       |
| UD(0,3)                                | 0.14                                   | 0.00                                             | 0.054                                 | 0.27                       |
| UD(0,3)                                | 0.14                                   | 0.13                                             | 0.054                                 | 0.30                       |
| UD(0,3)                                | 0.14                                   | 0.26                                             | 0.053                                 | 0.37                       |
| UD(0,3)                                | 0.14                                   | 0.39                                             | 0.052                                 | 0.45                       |
| UD(0,3)                                | 0.14                                   | 0.71                                             | 0.050                                 | 0.60                       |
| UD(0,3)                                | 0.26                                   | 0.00                                             | 0.062                                 | 0.28                       |
| UD(0,3)                                | 0.26                                   | 0.13                                             | 0.061                                 | 0.30                       |
| UD(0,3)                                | 0.26                                   | 0.26                                             | 0.061                                 | 0.33                       |
| UD(0,3)                                | 0.26                                   | 0.39                                             | 0.060                                 | 0.36                       |
| UD(0,3)                                | 0.26                                   | 0.71                                             | 0.058                                 | 0.46                       |

Table 26: Sensitivity analysis for Wei's urn design UD(1,1)

| Randomization<br>Procedure<br>[ $RP$ ] | Selection<br>Bias<br>Effect [ $\eta$ ] | Linear-Time<br>Trend Bias<br>Effect [ $\theta$ ] | Type I Error<br>Probability<br>[mean] | $P_{RP}(\omega \leq 0.05)$ |
|----------------------------------------|----------------------------------------|--------------------------------------------------|---------------------------------------|----------------------------|
| UD(1,1)                                | 0.00                                   | 0.00                                             | 0.050                                 | 0.00                       |
| UD(1,1)                                | 0.00                                   | 0.13                                             | 0.050                                 | 0.79                       |
| UD(1,1)                                | 0.00                                   | 0.26                                             | 0.050                                 | 0.80                       |
| UD(1,1)                                | 0.00                                   | 0.39                                             | 0.049                                 | 0.80                       |
| UD(1,1)                                | 0.00                                   | 0.71                                             | 0.046                                 | 0.82                       |
| UD(1,1)                                | 0.04                                   | 0.00                                             | 0.050                                 | 0.29                       |
| UD(1,1)                                | 0.04                                   | 0.13                                             | 0.050                                 | 0.45                       |
| UD(1,1)                                | 0.04                                   | 0.26                                             | 0.050                                 | 0.62                       |
| UD(1,1)                                | 0.04                                   | 0.39                                             | 0.049                                 | 0.73                       |
| UD(1,1)                                | 0.04                                   | 0.71                                             | 0.047                                 | 0.79                       |
| UD(1,1)                                | 0.09                                   | 0.00                                             | 0.051                                 | 0.28                       |
| UD(1,1)                                | 0.09                                   | 0.13                                             | 0.051                                 | 0.36                       |
| UD(1,1)                                | 0.09                                   | 0.26                                             | 0.051                                 | 0.47                       |
| UD(1,1)                                | 0.09                                   | 0.39                                             | 0.050                                 | 0.57                       |
| UD(1,1)                                | 0.09                                   | 0.71                                             | 0.048                                 | 0.71                       |
| UD(1,1)                                | 0.14                                   | 0.00                                             | 0.053                                 | 0.32                       |
| UD(1,1)                                | 0.14                                   | 0.13                                             | 0.053                                 | 0.35                       |
| UD(1,1)                                | 0.14                                   | 0.26                                             | 0.053                                 | 0.41                       |
| UD(1,1)                                | 0.14                                   | 0.39                                             | 0.052                                 | 0.48                       |
| UD(1,1)                                | 0.14                                   | 0.71                                             | 0.049                                 | 0.62                       |
| UD(1,1)                                | 0.26                                   | 0.00                                             | 0.060                                 | 0.33                       |
| UD(1,1)                                | 0.26                                   | 0.13                                             | 0.059                                 | 0.34                       |
| UD(1,1)                                | 0.26                                   | 0.26                                             | 0.059                                 | 0.37                       |
| UD(1,1)                                | 0.26                                   | 0.39                                             | 0.058                                 | 0.40                       |
| UD(1,1)                                | 0.26                                   | 0.71                                             | 0.056                                 | 0.49                       |

Table 27: Sensitivity analysis for Wei's urn design UD(1,2)

| Randomization<br>Procedure<br>[ $RP$ ] | Selection<br>Bias<br>Effect [ $\eta$ ] | Linear-Time<br>Trend Bias<br>Effect [ $\theta$ ] | Type I Error<br>Probability<br>[mean] | $P_{RP}(\omega \leq 0.05)$ |
|----------------------------------------|----------------------------------------|--------------------------------------------------|---------------------------------------|----------------------------|
| UD(1,2)                                | 0.00                                   | 0.00                                             | 0.050                                 | 0.00                       |
| UD(1,2)                                | 0.00                                   | 0.13                                             | 0.050                                 | 0.80                       |
| UD(1,2)                                | 0.00                                   | 0.26                                             | 0.050                                 | 0.81                       |
| UD(1,2)                                | 0.00                                   | 0.39                                             | 0.049                                 | 0.80                       |
| UD(1,2)                                | 0.00                                   | 0.71                                             | 0.046                                 | 0.82                       |
| UD(1,2)                                | 0.04                                   | 0.00                                             | 0.050                                 | 0.27                       |
| UD(1,2)                                | 0.04                                   | 0.13                                             | 0.050                                 | 0.45                       |
| UD(1,2)                                | 0.04                                   | 0.26                                             | 0.050                                 | 0.61                       |
| UD(1,2)                                | 0.04                                   | 0.39                                             | 0.049                                 | 0.73                       |
| UD(1,2)                                | 0.04                                   | 0.71                                             | 0.047                                 | 0.79                       |
| UD(1,2)                                | 0.09                                   | 0.00                                             | 0.052                                 | 0.26                       |
| UD(1,2)                                | 0.09                                   | 0.13                                             | 0.051                                 | 0.34                       |
| UD(1,2)                                | 0.09                                   | 0.26                                             | 0.051                                 | 0.46                       |
| UD(1,2)                                | 0.09                                   | 0.39                                             | 0.050                                 | 0.57                       |
| UD(1,2)                                | 0.09                                   | 0.71                                             | 0.048                                 | 0.71                       |
| UD(1,2)                                | 0.14                                   | 0.00                                             | 0.053                                 | 0.30                       |
| UD(1,2)                                | 0.14                                   | 0.13                                             | 0.053                                 | 0.33                       |
| UD(1,2)                                | 0.14                                   | 0.26                                             | 0.053                                 | 0.40                       |
| UD(1,2)                                | 0.14                                   | 0.39                                             | 0.052                                 | 0.47                       |
| UD(1,2)                                | 0.14                                   | 0.71                                             | 0.049                                 | 0.62                       |
| UD(1,2)                                | 0.26                                   | 0.00                                             | 0.060                                 | 0.32                       |
| UD(1,2)                                | 0.26                                   | 0.13                                             | 0.060                                 | 0.33                       |
| UD(1,2)                                | 0.26                                   | 0.26                                             | 0.060                                 | 0.35                       |
| UD(1,2)                                | 0.26                                   | 0.39                                             | 0.059                                 | 0.39                       |
| UD(1,2)                                | 0.26                                   | 0.71                                             | 0.057                                 | 0.48                       |

Table 28: Sensitivity analysis for Wei's urn design UD(1,3)

| Randomization<br>Procedure<br>[ $RP$ ] | Selection<br>Bias<br>Effect [ $\eta$ ] | Linear-Time<br>Trend Bias<br>Effect [ $\theta$ ] | Type I Error<br>Probability<br>[mean] | $P_{RP}(\omega \leq 0.05)$ |
|----------------------------------------|----------------------------------------|--------------------------------------------------|---------------------------------------|----------------------------|
| UD(1,3)                                | 0.00                                   | 0.00                                             | 0.050                                 | 0.00                       |
| UD(1,3)                                | 0.00                                   | 0.13                                             | 0.050                                 | 0.80                       |
| UD(1,3)                                | 0.00                                   | 0.26                                             | 0.050                                 | 0.80                       |
| UD(1,3)                                | 0.00                                   | 0.39                                             | 0.049                                 | 0.80                       |
| UD(1,3)                                | 0.00                                   | 0.71                                             | 0.046                                 | 0.82                       |
| UD(1,3)                                | 0.04                                   | 0.00                                             | 0.050                                 | 0.26                       |
| UD(1,3)                                | 0.04                                   | 0.13                                             | 0.050                                 | 0.44                       |
| UD(1,3)                                | 0.04                                   | 0.26                                             | 0.050                                 | 0.61                       |
| UD(1,3)                                | 0.04                                   | 0.39                                             | 0.049                                 | 0.73                       |
| UD(1,3)                                | 0.04                                   | 0.71                                             | 0.047                                 | 0.79                       |
| UD(1,3)                                | 0.09                                   | 0.00                                             | 0.052                                 | 0.26                       |
| UD(1,3)                                | 0.09                                   | 0.13                                             | 0.051                                 | 0.33                       |
| UD(1,3)                                | 0.09                                   | 0.26                                             | 0.051                                 | 0.45                       |
| UD(1,3)                                | 0.09                                   | 0.39                                             | 0.050                                 | 0.56                       |
| UD(1,3)                                | 0.09                                   | 0.71                                             | 0.048                                 | 0.71                       |
| UD(1,3)                                | 0.14                                   | 0.00                                             | 0.053                                 | 0.29                       |
| UD(1,3)                                | 0.14                                   | 0.13                                             | 0.053                                 | 0.32                       |
| UD(1,3)                                | 0.14                                   | 0.26                                             | 0.053                                 | 0.39                       |
| UD(1,3)                                | 0.14                                   | 0.39                                             | 0.052                                 | 0.47                       |
| UD(1,3)                                | 0.14                                   | 0.71                                             | 0.050                                 | 0.61                       |
| UD(1,3)                                | 0.26                                   | 0.00                                             | 0.061                                 | 0.31                       |
| UD(1,3)                                | 0.26                                   | 0.13                                             | 0.061                                 | 0.32                       |
| UD(1,3)                                | 0.26                                   | 0.26                                             | 0.060                                 | 0.35                       |
| UD(1,3)                                | 0.26                                   | 0.39                                             | 0.060                                 | 0.38                       |
| UD(1,3)                                | 0.26                                   | 0.71                                             | 0.057                                 | 0.47                       |

Table 29: Sensitivity analysis for Wei's urn design UD(2,1)

| Randomization<br>Procedure<br>[ $RP$ ] | Selection<br>Bias<br>Effect [ $\eta$ ] | Linear-Time<br>Trend Bias<br>Effect [ $\theta$ ] | Type I Error<br>Probability<br>[mean] | $P_{RP}(\omega \leq 0.05)$ |
|----------------------------------------|----------------------------------------|--------------------------------------------------|---------------------------------------|----------------------------|
| UD(2,1)                                | 0.00                                   | 0.00                                             | 0.050                                 | 0.00                       |
| UD(2,1)                                | 0.00                                   | 0.13                                             | 0.050                                 | 0.79                       |
| UD(2,1)                                | 0.00                                   | 0.26                                             | 0.050                                 | 0.79                       |
| UD(2,1)                                | 0.00                                   | 0.39                                             | 0.049                                 | 0.79                       |
| UD(2,1)                                | 0.00                                   | 0.71                                             | 0.047                                 | 0.81                       |
| UD(2,1)                                | 0.04                                   | 0.00                                             | 0.050                                 | 0.30                       |
| UD(2,1)                                | 0.04                                   | 0.13                                             | 0.050                                 | 0.46                       |
| UD(2,1)                                | 0.04                                   | 0.26                                             | 0.050                                 | 0.62                       |
| UD(2,1)                                | 0.04                                   | 0.39                                             | 0.049                                 | 0.73                       |
| UD(2,1)                                | 0.04                                   | 0.71                                             | 0.047                                 | 0.79                       |
| UD(2,1)                                | 0.09                                   | 0.00                                             | 0.051                                 | 0.30                       |
| UD(2,1)                                | 0.09                                   | 0.13                                             | 0.051                                 | 0.37                       |
| UD(2,1)                                | 0.09                                   | 0.26                                             | 0.051                                 | 0.48                       |
| UD(2,1)                                | 0.09                                   | 0.39                                             | 0.050                                 | 0.58                       |
| UD(2,1)                                | 0.09                                   | 0.71                                             | 0.048                                 | 0.71                       |
| UD(2,1)                                | 0.14                                   | 0.00                                             | 0.053                                 | 0.34                       |
| UD(2,1)                                | 0.14                                   | 0.13                                             | 0.053                                 | 0.37                       |
| UD(2,1)                                | 0.14                                   | 0.26                                             | 0.052                                 | 0.43                       |
| UD(2,1)                                | 0.14                                   | 0.39                                             | 0.052                                 | 0.49                       |
| UD(2,1)                                | 0.14                                   | 0.71                                             | 0.049                                 | 0.63                       |
| UD(2,1)                                | 0.26                                   | 0.00                                             | 0.059                                 | 0.35                       |
| UD(2,1)                                | 0.26                                   | 0.13                                             | 0.059                                 | 0.36                       |
| UD(2,1)                                | 0.26                                   | 0.26                                             | 0.058                                 | 0.39                       |
| UD(2,1)                                | 0.26                                   | 0.39                                             | 0.058                                 | 0.42                       |
| UD(2,1)                                | 0.26                                   | 0.71                                             | 0.055                                 | 0.50                       |

Table 30: Sensitivity analysis for Wei's urn design UD(2,2)

| Randomization<br>Procedure<br>[ $RP$ ] | Selection<br>Bias<br>Effect [ $\eta$ ] | Linear-Time<br>Trend Bias<br>Effect [ $\theta$ ] | Type I Error<br>Probability<br>[mean] | $P_{RP}(\omega \leq 0.05)$ |
|----------------------------------------|----------------------------------------|--------------------------------------------------|---------------------------------------|----------------------------|
| UD(2,2)                                | 0.00                                   | 0.00                                             | 0.050                                 | 0.00                       |
| UD(2,2)                                | 0.00                                   | 0.13                                             | 0.050                                 | 0.79                       |
| UD(2,2)                                | 0.00                                   | 0.26                                             | 0.050                                 | 0.80                       |
| UD(2,2)                                | 0.00                                   | 0.39                                             | 0.049                                 | 0.80                       |
| UD(2,2)                                | 0.00                                   | 0.71                                             | 0.046                                 | 0.82                       |
| UD(2,2)                                | 0.04                                   | 0.00                                             | 0.050                                 | 0.28                       |
| UD(2,2)                                | 0.04                                   | 0.13                                             | 0.050                                 | 0.45                       |
| UD(2,2)                                | 0.04                                   | 0.26                                             | 0.050                                 | 0.62                       |
| UD(2,2)                                | 0.04                                   | 0.39                                             | 0.049                                 | 0.73                       |
| UD(2,2)                                | 0.04                                   | 0.71                                             | 0.047                                 | 0.79                       |
| UD(2,2)                                | 0.09                                   | 0.00                                             | 0.051                                 | 0.28                       |
| UD(2,2)                                | 0.09                                   | 0.13                                             | 0.051                                 | 0.35                       |
| UD(2,2)                                | 0.09                                   | 0.26                                             | 0.051                                 | 0.47                       |
| UD(2,2)                                | 0.09                                   | 0.39                                             | 0.050                                 | 0.57                       |
| UD(2,2)                                | 0.09                                   | 0.71                                             | 0.048                                 | 0.71                       |
| UD(2,2)                                | 0.14                                   | 0.00                                             | 0.053                                 | 0.31                       |
| UD(2,2)                                | 0.14                                   | 0.13                                             | 0.053                                 | 0.35                       |
| UD(2,2)                                | 0.14                                   | 0.26                                             | 0.052                                 | 0.41                       |
| UD(2,2)                                | 0.14                                   | 0.39                                             | 0.052                                 | 0.48                       |
| UD(2,2)                                | 0.14                                   | 0.71                                             | 0.049                                 | 0.62                       |
| UD(2,2)                                | 0.26                                   | 0.00                                             | 0.060                                 | 0.33                       |
| UD(2,2)                                | 0.26                                   | 0.13                                             | 0.059                                 | 0.35                       |
| UD(2,2)                                | 0.26                                   | 0.26                                             | 0.059                                 | 0.37                       |
| UD(2,2)                                | 0.26                                   | 0.39                                             | 0.058                                 | 0.40                       |
| UD(2,2)                                | 0.26                                   | 0.71                                             | 0.056                                 | 0.49                       |

Table 31: Sensitivity analysis for Wei's urn design UD(2,3)

| Randomization<br>Procedure<br>[ $RP$ ] | Selection<br>Bias<br>Effect [ $\eta$ ] | Linear-Time<br>Trend Bias<br>Effect [ $\theta$ ] | Type I Error<br>Probability<br>[mean] | $P_{RP}(\omega \leq 0.05)$ |
|----------------------------------------|----------------------------------------|--------------------------------------------------|---------------------------------------|----------------------------|
| UD(2,3)                                | 0.00                                   | 0.00                                             | 0.050                                 | 0.00                       |
| UD(2,3)                                | 0.00                                   | 0.13                                             | 0.050                                 | 0.79                       |
| UD(2,3)                                | 0.00                                   | 0.26                                             | 0.050                                 | 0.80                       |
| UD(2,3)                                | 0.00                                   | 0.39                                             | 0.049                                 | 0.80                       |
| UD(2,3)                                | 0.00                                   | 0.71                                             | 0.046                                 | 0.82                       |
| UD(2,3)                                | 0.04                                   | 0.00                                             | 0.050                                 | 0.28                       |
| UD(2,3)                                | 0.04                                   | 0.13                                             | 0.050                                 | 0.45                       |
| UD(2,3)                                | 0.04                                   | 0.26                                             | 0.050                                 | 0.61                       |
| UD(2,3)                                | 0.04                                   | 0.39                                             | 0.049                                 | 0.73                       |
| UD(2,3)                                | 0.04                                   | 0.71                                             | 0.047                                 | 0.80                       |
| UD(2,3)                                | 0.09                                   | 0.00                                             | 0.051                                 | 0.27                       |
| UD(2,3)                                | 0.09                                   | 0.13                                             | 0.051                                 | 0.34                       |
| UD(2,3)                                | 0.09                                   | 0.26                                             | 0.051                                 | 0.46                       |
| UD(2,3)                                | 0.09                                   | 0.39                                             | 0.050                                 | 0.57                       |
| UD(2,3)                                | 0.09                                   | 0.71                                             | 0.048                                 | 0.71                       |
| UD(2,3)                                | 0.14                                   | 0.00                                             | 0.053                                 | 0.30                       |
| UD(2,3)                                | 0.14                                   | 0.13                                             | 0.053                                 | 0.34                       |
| UD(2,3)                                | 0.14                                   | 0.26                                             | 0.053                                 | 0.40                       |
| UD(2,3)                                | 0.14                                   | 0.39                                             | 0.052                                 | 0.47                       |
| UD(2,3)                                | 0.14                                   | 0.71                                             | 0.049                                 | 0.62                       |
| UD(2,3)                                | 0.26                                   | 0.00                                             | 0.060                                 | 0.32                       |
| UD(2,3)                                | 0.26                                   | 0.13                                             | 0.060                                 | 0.33                       |
| UD(2,3)                                | 0.26                                   | 0.26                                             | 0.059                                 | 0.36                       |
| UD(2,3)                                | 0.26                                   | 0.39                                             | 0.059                                 | 0.39                       |
| UD(2,3)                                | 0.26                                   | 0.71                                             | 0.056                                 | 0.48                       |
